1 **Epidemiology of the early COVID-19 epidemic in Orange County, California: comparison**  
2 **of predictors of test positivity, mortality, and seropositivity**

3

4 \*Daniel M. Parker<sup>1</sup>; <sup>¶</sup>Tim Bruckner<sup>1</sup>; Verónica M. Vieira<sup>1</sup>; Catalina Medina<sup>1</sup>; Vladimir N.  
5 Minin<sup>1</sup>; Philip L. Felgner<sup>1</sup>; Alissa Dratch<sup>2</sup>; Matthew Zahn<sup>2</sup>; Scott M. Bartell<sup>1</sup>; <sup>¶</sup>Bernadette  
6 Boden-Albala<sup>1</sup>

7 1. University of California, Irvine, California, U.S.A.

8 2. Orange County Health Care Agency, Santa Ana, California, U.S.A.

9

10 \*Corresponding author

11 <sup>¶</sup>TB was PI and BBA was MPIs for the serological survey. BBA oversaw the data exchange  
12 between UCI and the OCHCA as well.

13

14 Daniel M. Parker: dparker1@hs.uci.edu

15 Tim Bruckner: tim.bruckner@uci.edu

16 Verónica M. Vieira: vvieira@uci.edu

17 Catalina Medina: catalmm1@uci.edu

18 Vladimir N. Minin: vminin@uci.edu

19 Philip L. Felgner: pfelgner@hs.uci.edu

20 Alissa Dratch: ADratch@ochca.com

21 Matthew Zahn: MZahn@ochca.com

22 Scott M. Bartell: sbartell@uci.edu

23 Bernadette Boden-Albala: bbodenal@hs.uci.edu

24

25 **Abstract: 148 words**

26 **Main text: 3416 words**

27

28 **ABSTRACT**

29 COVID-19 is one of the largest public health emergencies in modern history. Here we present a  
30 detailed analysis from a large population center in Southern California (Orange County,  
31 population of 3.2 million) to understand heterogeneity in risks of infection, test positivity, and  
32 death. We used a combination of datasets, including a population-representative seroprevalence  
33 survey, to assess the true burden of disease as well as COVID-19 testing intensity, test positivity,  
34 and mortality. In the first month of the local epidemic, case incidence clustered in high income  
35 areas. This pattern quickly shifted, with cases next clustering in much higher rates in the north-  
36 central area which has a lower socio-economic status. Since April, a concentration of reported  
37 cases, test positivity, testing intensity, and seropositivity in a north-central area persisted. At the  
38 individual level, several factors (e.g., age, race/ethnicity, zip codes with low educational  
39 attainment) strongly affected risk of seropositivity and death.

40

41

42

43

44

45

46

47

48

49

50

## 51 INTRODUCTION

52 In late 2019 an epidemic of respiratory disease (coronavirus disease 19 or COVID-19),  
53 caused by a novel coronavirus (SARS-CoV-2) emerged in Wuhan, China, and rapidly spread  
54 worldwide. COVID-19 has manifested in different ways across social, economic, and  
55 demographic groups, with regard to apparent risk of infection, disease severity, and mortality (1–  
56 3). The elderly and those with co-morbidities are at the highest risk of severe disease (4). Many  
57 hospitalized patients require supplemental oxygen or ventilators (5), and there is a high mortality  
58 rate among those who are hospitalized (6). In many places healthcare facilities have been  
59 overwhelmed by a surge in cases and have fallen short of needed ventilators and ICU beds,  
60 resulting in massive morbidity and mortality(7,8). Availability of tests and operational barriers  
61 were limiting factors for diagnosis in parts of the U.S. during the early months of the pandemic  
62 (9).

63 California is the most populous state in the U.S., with an estimated 39.5 million  
64 inhabitants. Orange County (OC) is a coastal county in California, and the sixth most populous  
65 county in the country, with an estimated 3.2 million inhabitants). The first confirmed case in  
66 California (3<sup>rd</sup> in the U.S.) was reported from OC. On January 31 the WHO declared a Global  
67 Health Emergency, and on February 3<sup>rd</sup> the U.S. declared a public health emergency. Subsequent  
68 cases were reported in California in February, mostly among travelers. On February 26<sup>th</sup>, local  
69 ('community') transmission was first confirmed in the United States in northern California. OC  
70 had only 2 reported cases in February. By March 11 another 6 cases had been reported in OC. On  
71 March 12 there were 8 reported cases; followed by 23 on March 13; 11 each day on March 14  
72 and 15; and 32 on March 16. This surge in cases in mid-March in OC and other counties in  
73 California triggered emergency orders by the Governor and the County Health Officer at the

74 Orange County Health Care Agency, prohibiting public or private gatherings and also leading to  
75 school and business closures (10). Though many businesses were closed at this time, the  
76 mandated social distancing measures had exceptions in place for individuals working in  
77 “essential jobs,” which was broadly defined and included medical professionals, food providers,  
78 delivery agencies, public officials, contractors, and building laborers (11). The social and  
79 economic characteristics of individuals working essential jobs likely differs from the overall  
80 population.

81 Almost half of OC residents over the age of five speak a language other than English at  
82 home. Additionally, many within the Hispanic/Latino and Asian communities of OC live below  
83 the poverty level (17.9% and 16%, respectively) and face challenges in education, household  
84 income, access to healthcare, health disparities, and life expectancy (12,13). The relatively small  
85 land area, high population density, and diverse population of OC provides a unique opportunity  
86 to explore potentially important social, economic, and demographic correlates of COVID-19  
87 epidemiology.

88 Here we present results from a detailed spatiotemporal epidemiological analysis of  
89 COVID-19 in OC, California. First, we draw from reported tests and mortality from the county  
90 health agency. Given that passively detected cases are prone toward bias, in July we also  
91 conducted a seroprevalence survey to assess the true burden of disease in the county. In our  
92 analyses we leverage both datasets to compare predictors of test positivity, mortality, and  
93 seropositivity over the first 6 months of the epidemic.

94

## 95 **METHODS**

96 *Data.*

97 Case and Mortality data.

98 Case data were provided through a memorandum of understanding with the Orange  
99 County Health Care Agency (OCHCA) and consisted of individual level records of all negative  
100 and positive PCR tests conducted throughout the county from March 1 through August 16, 2020  
101 (this date aligns with our cross-sectional seroprevalence survey which completed on August 16).  
102 OCHCA receives testing data from the California Reportable Disease Information Exchange  
103 (CalREDIE), an infectious disease surveillance system implemented by the California  
104 Department of Public Health (CDPH) [14]. The data include information on test date, age,  
105 gender, race, ethnicity, and zip code of the individual taking the test. For individuals who had  
106 repeat PCR testing after testing positive, only the first positive diagnosis was included in our  
107 analyses. Mortality data were also provided by OCHCA and consisted of individual-level records  
108 of deaths attributed to COVID-19.

109

110 Seroprevalence data.

111 Participants for the serological survey were recruited using a proprietary database  
112 maintained by SoapBoxSample, an LRW Group Company. The database is intended to be  
113 representative of the age, income, and racial/ethnic diversity of OC. Participants were contacted  
114 by email or phone. We recruited one participant per household to participate in a survey on their  
115 thoughts and opinions regarding COVID-19. The survey included questions on socio-  
116 demographics, occupation, social activities, any illness or symptoms in the last few months, and  
117 whether the individual had been diagnosed with COVID-19. After completing this portion of the  
118 survey, each eligible participant was asked if they would be willing to participate in a drive-thru  
119 blood test for SARS-CoV-2 antibodies. Eligibility for antibody testing was restricted to a quota

120 sample designed to be demographically representative of the county as a whole. Recruitment to  
121 the antibody test was delayed to the end of the questionnaire in order to avoid biasing the  
122 serological survey toward individuals who believe that they were infected with SARS-CoV-2.  
123 There were a total of 10 field sites for drive-through blood tests, dispersed throughout OC in  
124 order to minimize driving distances for participants. The seroprevalence study design and overall  
125 findings for OC are described in more detail elsewhere (14).

126

#### 127 Serological test.

128 We used a coronavirus antigen microarray to classify participants from the serological  
129 survey as seropositive or seronegative. The array tests for both IgG and IgM and contains 12  
130 antigens from SARS-CoV-2 (described in detail at (15)).

131

#### 132 Zip-code level socio-demographic data.

133 At the zip-code level we included median household income, the percentage of adults  
134 above age 25 who have at least a bachelor's degree, and the percentage of adults who have had  
135 insurance in the previous 5 years. These data come from the 2018 American Community Survey  
136 of 2018 (extracted from (12)).

137

#### 138 *Analysis.*

##### 139 Descriptive Spatiotemporal Data Analysis.

140 Reported cases and number of tests were aggregated at the zip code level and by week. A  
141 total of 85 zip codes were included in the analysis. For plotting cases on OC maps, the data were  
142 further aggregated by months (March through August). Case incidence was calculated and

143 mapped as positive cases per 100,000 population per week. Testing intensity was calculated and  
144 mapped as total number of tests per 100,000 people per week. Test positivity was calculated and  
145 mapped as the percentage of positive tests for each month.

146 Formal testing of spatial autocorrelation was done using the global Moran's *I* statistic and  
147 spatial correlograms. Both identify the presence and extent of clustering or dispersion. Local  
148 clustering statistics (Local Indicators of Spatial Autocorrelation or LISA (16)) were then used to  
149 visualize the location of clusters. All tests were run for case incidence, test positivity, and test  
150 intensity. Seropositivity was also mapped and assessed using LISA statistics (since this was a  
151 cross sectional survey there is no time component).

152

### 153 Relational Analysis of COVID-19 Test Positivity, Mortality, and Seropositivity.

154 We used logistic regressions to explore geographic, demographic, economic, and  
155 epidemiological predictors of the odds of testing positive for COVID-19, of dying from COVID-  
156 19, and of being seropositive for SARS-CoV-2 antibodies. Predictors in our models are listed in  
157 **Supplementary Table 1** and included: age group, gender, and race/ethnicity at the individual  
158 level. Zip code level predictors included: median household income, the percentage of adults  
159 over age 25 with at least a bachelor's degree, the percentage of adults who have had insurance in  
160 the previous 5 years, and population density (individuals per square kilometer).

161 Several specifications were tested for model fit, interpretability, and parsimony. Through  
162 preliminary exploratory analyses we noted that the first cases were reported from coastal zip-  
163 codes but that this pattern had shifted inland over time. Given the changing dynamics over time,  
164 we explored different specifications for 'time' in the model for test positivity. The best fitting

165 model included a smoothed interaction term for time (coded by day, **Supplemental Table 1**) and  
166 median household income at the zip code level.

167 The same predictors were included in the model for mortality, save for the interaction  
168 between time and median household income (which did not improve model performance). Given  
169 reports of increased mortality related to hospital bed shortages, we also included as a predictor  
170 the number of ICU beds occupied by suspected or confirmed COVID-19 patients on the day that  
171 an individual tested positive for SARS-CoV-2.

172 We compared three seropositivity models, with various combinations of individual and  
173 zip-code level predictors (see details in **Supplementary Appendix A**). All model results are  
174 presented as model adjusted odds ratios (AORs) with 95% confidence intervals (CIs). Model  
175 summary statistics, including model Bayesian Information Criterion are presented in  
176 **Supplementary Appendix A**.

177

### 178 *Software.*

179 Maps were created using QGIS version 3.4.9. Tests for spatial autocorrelation were done  
180 using GeoDa version 1.14.0. All other analyses were conducted using R statistical software  
181 version 3.5.2.

182

## 183 **RESULTS**

184 A total of 597,922 tests were reported to OCHCA up to August 16, 2020. After dropping  
185 repeated tests and those with incomplete data, 318,492 individuals were included. Of these  
186 individuals, 36,816 tested positive for COVID-19 and 1,248 died from the disease. In the



187 separate population-based serological survey, 2,979 individuals participated and 350 tested  
188 seropositive.

189

### 190 *Spatial patterns in reported COVID-19 cases, testing intensity, and seropositivity*

191 The global Moran's  $I$  statistics and spatial correlograms indicated significant clustering in  
192 reported cases and testing intensity in the first month (March) of the local epidemic (**Table 1;**  
193 **Supplementary Figures 3 and 4**). Conversely, there was no detectable clustering of test  
194 positivity in March (**Table 1, Supplementary Figure 5**). The highest reported case incidence in  
195 March was along the central coast and southern portion of the county (**Figure 1 A**). The LISA  
196 statistics indicated statistically significant clustering of high incidence zip codes in the central  
197 coast area (**Figure 1 B**). This clustering of case incidence overlaps with clustering of test  
198 intensity in March (**Figure 2 A and B**).

199 Clustering of both reported cases and test positivity increased in magnitude in May  
200 (**Table 1 and Supplementary Figures 3 and 5**). While clustering in test intensity (**Table 1;**  
201 **Supplemental Figure 4**) was high in March, it decreased in May as access to testing spread  
202 throughout much of the county. Clustering in testing intensity increased again in June and July  
203 (centered on the hotspots in the north-central part of the county, evident in **Figures 1 and 3**). By  
204 April, case incidence, testing intensity, and test positivity had all shifted to a growing cluster in  
205 the north-central part of the county. Zip code level seropositivity also revealed a cluster in the  
206 north-central part of OC (**Figure 4**), especially in the city of Santa Ana (**Supplementary Figure**  
207 **1**).

208

### 209 *Results from GAM Logistic Regressions*

210 Factors associated with testing positive for SARS-CoV-2 infection

211 Age was a strong predictor of testing positive. Individuals in the 10-14 and 15-19 age  
212 groups had the highest odds of testing positive (both with approximately 2.2 times the odds of  
213 testing positive in comparison to the 0 – 4 age group (**Table 2** and **Figure 5**)). Males had 1.2  
214 times the odds of testing positive (95% CI: 1.18 – 1.23). Individuals who identified as Hispanic  
215 or Latino had 1.7 times the odds of testing positive (CI: 1.63 – 1.79) when compared to whites,  
216 while Asian (AOR: 0.52; CI: 0.49 – 0.55), Black (AOR: 0.58; CI: 0.52 – 0.66), and Pacific  
217 Islander (AOR: 0.35; CI: 0.29 – 0.42) individuals had lower odds of testing positive. A large  
218 proportion of individuals did not have attributable race or ethnicity data in the records (63 % of  
219 all records through August 16).

220 Zip code level population density was not a significant predictor of testing positive  
221 (**Table 2, Figure 5**). However, education (percentage of adults with at least a bachelor's degree),  
222 insurance coverage (percentage of adults who had insurance in the previous 5 years), and median  
223 household income were all statistically significant predictors of testing positive. For example,  
224 individuals who lived in zip codes with the highest education levels had 39% decreased odds of  
225 testing positive (AOR for the fourth quartile: 0.61; CI: 0.49 – 0.76). In addition, the interaction  
226 between zip code level median household income (**Supplementary Figure 2**) indicates that  
227 individuals from wealthier zip codes had increased risk of testing positive at the beginning of the  
228 OC epidemic. However, this pattern quickly shifted, with individuals from lower income areas  
229 showing the highest odds of testing positive in subsequent months.

230

231 Factors associated with COVID-19 associated mortality

232 For each increase in 10 years of age there was an associated 2.5 fold increase in the odds  
233 of mortality (AOR: 2.56, CI: 2.46 – 2.67; **Table 3, Figure 6**). Infected males were almost twice  
234 as likely to die from COVID-19 when compared to females (AOR: 1.97; CI: 1.71 – 2.26). While  
235 Asian individuals were less likely to test positive for SARS-CoV-2 infection (**Table 2**), those  
236 who did test positive had higher odds of mortality. Compared to whites, Asians had 31%  
237 increased odds of dying from COVID-19 (AOR: 1.31; CI: 1.08 – 1.59).

238 Living in zip codes with high education levels and insurance coverage was also  
239 predictive of mortality outcomes (**Table 3, Figure 6**). Individuals who tested positive for  
240 COVID-19 and lived in zip codes with the highest levels of educational attainment had 45%  
241 lower odds of dying (AOR for the fourth quartile: 0.55; CI: 0.34 – 0.89). Those who lived in zip  
242 codes with the highest levels of insurance coverage had 41% lower odds of dying. Zip code level  
243 population density and median household income were not significant predictors of mortality  
244 after accounting for the other risk factors.

245 There was no significant change in risk of COVID-19 mortality over this time period.  
246 The number of COVID-19 patients in ICU was also not predictive of mortality.

247

#### 248 Factors associated with SARS-CoV-2 seropositivity

249 Zip code level cumulative incidence was a significant predictor of individual-level  
250 seropositivity in the absence of other zip code level predictors (**Supplementary Table 2**). Every  
251 increase in 10% of the zip code cumulative incidence resulted in approximately a 50% increase  
252 in the odds that an individual would be seropositive.

253 Zip code level cumulative incidence was no longer a statistically significant predictor of  
254 seropositivity when other zip code level predictors were added to the model (**Table 4, Figure 7**).

255 In the full model (including all zip code level covariates) median household income had a  
256 protective effect, with individuals coming from zip codes with higher median household income  
257 having lower odds of being seropositive for SARS-CoV-2 antibodies (AOR for every one  
258 standard deviation increase: 0.75; CI: 0.57 – 0.98).

259 We found no difference in age groups with regard to seropositivity. While males were  
260 more likely to test positive or to die from SARS-CoV-2 infection, they were less likely than  
261 females to be seropositive (AOR: 0.75; CI: 0.59 – 0.94). Hispanic and Latino individuals had  
262 55% increased odds of being seropositive (AOR: 1.55, CI: 1.17 – 2.03). Pacific Islanders may  
263 also have had higher odds of being seropositive, but with small total numbers and broad  
264 confidence intervals (AOR: 3.94, CI: 1.07 – 14.57; a total of 3 out of 12 individuals tested were  
265 seropositive).

266

## 267 **DISCUSSION**

268 Infectious disease data from passive case detection can be biased in a variety of ways,  
269 including the well-documented challenge of uneven access to testing and diagnosis (17). In our  
270 analysis of COVID-19 in OC, we used a rich set of complementary data that include those  
271 passively collected (reported cases, mortality records) and those from active screening  
272 (population-based serological testing). Results indicate that, in the early days of the epidemic in  
273 OC, both testing intensity and test positivity concentrated in wealthy and affluent areas along the  
274 central coast. After March, however, a large cluster of reported cases formed in lower-income  
275 North-Central OC (especially the cities of Santa Ana and Anaheim, **Supplementary Figure 1**),  
276 growing in size in May and persisting over time. Testing intensity has spread throughout the  
277 county during this same time period.

278 Consistent with emerging reports, we also found that age and male gender strongly  
279 predict testing positive and COVID-19 associated mortality (18). Intriguingly, whereas older age  
280 groups and males were more likely to have symptomatic disease, our population-based  
281 serological survey found that females were more likely than males to be seropositive. Hispanic  
282 and Latino individuals had higher risk of infection and testing positive, even after controlling for  
283 several zip code level socio-economic factors. Given the consistency of this racial/ethnic finding  
284 between the models for test positivity and seropositivity, the risk of being infected with SARS-  
285 CoV-2 rises above and beyond the risks of living in a zip code with high transmission or a zip  
286 code with low-income and low levels of educational attainment. Other studies also note an  
287 increased risk of testing positive for Hispanics and Latinos (19–21). Our seroprevalence survey  
288 indicates that in OC, this finding is not an artifact of passive case detection but instead represents  
289 a true greater risk of infection for Hispanics and Latinos.

290 While Asians were less likely to test positive for COVID-19, they were more likely to die  
291 when infected. This disparity is consistent with national data, though its cause is uncertain (22).  
292 This pattern may reflect discrepancies in outreach communication to these communities or other  
293 socio-economic and cultural factors (23,24) and warrants further detailed investigation.

294 Social determinants of health, defined as "conditions in which people are born, grow,  
295 work, live, age, and the wider set of forces and systems," play a critical role in the creation of  
296 disparities related to morbidity, mortality, and quality of life (25). These social determinants  
297 include (among other factors) poverty, wealth, educational quality, neighborhood conditions,  
298 childhood experience, and social support. Several speculative explanations have been proposed  
299 for these sociodemographic patterns related to COVID-19, including living in dense quarters. In  
300 addition, as the state and local shelter in place and social distancing policies were mandated,

301 individuals who are independently wealthy or who work in occupations where working from  
302 home is a viable option, were more capable of practicing social (more accurately “physical”)  
303 distancing. People from low socioeconomic status (SES) areas, by contrast, may have less ability  
304 to practice social distancing. Our analyses show that individuals from zip codes with lower  
305 overall educational attainment and insurance coverage were more likely to test positive for and  
306 die from COVID-19. The association with median household income was more complex and  
307 changed over time with regard to test positivity. However, we also find that individuals from zip  
308 codes with lower median household income were also more likely to be seropositive for SARS-  
309 CoV-2. These findings underscore the importance of understanding contextual factors  
310 surrounding infectious disease outbreaks.

311         Study limitations include that County-reported testing and mortality data did not include  
312 individual-level information on income, education, and insurance. These variables were only  
313 available at the zip code level. Zip codes are unlikely to adequately represent important spatial  
314 units (e.g., neighborhoods, communities). Our measure of population density may also not  
315 accurately capture the importance of housing or household density. Missing data on  
316 race/ethnicity (63% of all official test records) and small counts of some race/ethnicity groups  
317 may have impacted our findings for groups with low counts in this analysis. Even when  
318 race/ethnicity data were available, they were broad categories (i.e. Asian rather than specific  
319 Asian ethnicities). We also note, however, that the population-based seroprevalence data on  
320 SARS-CoV-2 included detailed individual-level information on socio-demographic covariates,  
321 which we exploited for our detailed analyses.

322         Study strengths include the diversity of OC in terms of socioeconomic and demographic  
323 predictors, which provide sufficient power to investigate these factors in our analyses. California

324 was also one of the first states to issue an executive order for residents to stay home, providing  
325 data for several months when only essential workers were permitted to work outside the home.  
326 Our analyses were able to identify temporal shifts in the demographics of COVID-19 test  
327 positivity that likely reflect disparities related to occupation type that are further amplified by  
328 household characteristics. Finally, we are able to assess differences in risk of infection and test  
329 positivity by comparing our population-level serological survey to routinely collected (passive)  
330 data from County statistics.

331 The reasons for the spatial, socio-demographic, and economic patterns we discovered are  
332 likely complex and broadly related to issues of accessing health care and general social  
333 determinants of health. The clear disparities in how this disease has manifested in OC point  
334 toward the need for approaches that are socio-culturally appropriate and those that have a focus  
335 on health equity as a fundamental building block. Measures that focus on the hardest-hit  
336 communities may serve as efficient points of intervention for COVID-19.

337

## 338 **ACKNOWLEDGEMENTS**

339 We acknowledge the actOC research manager (Emily Drum) and logistical expertise of  
340 Dr Bruce Albala for setting up and helping run the seroprevalence study. Many UCI students and  
341 alumni were involved in collecting blood samples for the serological survey and we gratefully  
342 acknowledge their contributions. We are grateful to the Felgner lab members who made the  
343 serological survey possible under sometimes trying conditions (especially Rie Nakajima, Aarti  
344 Jain, and Rafael Ramiro de Assis). Guiyun Yan and Xiaoming Wang provided space for cold  
345 storage. The serological survey was funded through a contract with OCHCA (MA-042-  
346 20011978). We also acknowledge conversations with colleagues and community leaders with

347 regard to social determinants of health and health equity, including but not limited to: Sora  
348 Tanjasiri, Mary Anne Foo, Brittany Morey, Ahn Ellen, Tricia Nguyen, America Bracho, and  
349 many others.

### 350 **First author biography**

351 Dr. Parker is an infectious disease epidemiologist with expertise in spatial epidemiology,  
352 demography, and biomedical anthropology. He is an assistant professor in public health at the  
353 University of California, Irvine and the director of the Global Health Research, Education, and  
354 Translation (GHREAT) initiative.

### 355 **REFERENCES**

- 356 1. Dowd JB, Andriano L, Brazel DM, Rotondi V, Block P, Ding X, et al. Demographic science aids in  
357 understanding the spread and fatality rates of COVID-19. PNAS [Internet]. 2020 Apr 16 [cited 2020  
358 Apr 23]; Available from: <https://www.pnas.org/content/early/2020/04/15/2004911117>
- 359 2. Dorn A van, Cooney RE, Sabin ML. COVID-19 exacerbating inequalities in the US. The Lancet. 2020  
360 Apr 18;395(10232):1243–4.
- 361 3. Yancy CW. COVID-19 and African Americans. JAMA [Internet]. 2020 Apr 15 [cited 2020 Apr 23];  
362 Available from: <https://jamanetwork.com/journals/jama/fullarticle/2764789>
- 363 4. Garg S. Hospitalization Rates and Characteristics of Patients Hospitalized with Laboratory-  
364 Confirmed Coronavirus Disease 2019 — COVID-NET, 14 States, March 1–30, 2020. MMWR Morb  
365 Mortal Wkly Rep [Internet]. 2020 [cited 2020 Apr 23];69. Available from:  
366 <https://www.cdc.gov/mmwr/volumes/69/wr/mm6915e3.htm>
- 367 5. Dondorp AM, Hayat M, Aryal D, Beane A, Schultz MJ. Respiratory Support in Novel Coronavirus  
368 Disease (COVID-19) Patients, with a Focus on Resource-Limited Settings. The American Journal of  
369 Tropical Medicine and Hygiene [Internet]. 2020 Apr 21 [cited 2020 Apr 23]; Available from:  
370 <http://www.ajtmh.org/content/journals/10.4269/ajtmh.20-0283>
- 371 6. Bhatraju PK, Ghassemieh BJ, Nichols M, Kim R, Jerome KR, Nalla AK, et al. Covid-19 in Critically Ill  
372 Patients in the Seattle Region — Case Series. New England Journal of Medicine. 2020 Mar  
373 30;0(0):null.
- 374 7. Yang X, Yu Y, Xu J, Shu H, Xia J, Liu H, et al. Clinical course and outcomes of critically ill patients  
375 with SARS-CoV-2 pneumonia in Wuhan, China: a single-centered, retrospective, observational  
376 study. The Lancet Respiratory Medicine [Internet]. 2020 Feb 24 [cited 2020 Apr 23];0(0). Available  
377 from: [https://www.thelancet.com/journals/lanres/article/PIIS2213-2600\(20\)30079-5/abstract](https://www.thelancet.com/journals/lanres/article/PIIS2213-2600(20)30079-5/abstract)



- 378 8. Grasselli G, Pesenti A, Cecconi M. Critical Care Utilization for the COVID-19 Outbreak in Lombardy,  
379 Italy: Early Experience and Forecast During an Emergency Response. *JAMA* [Internet]. 2020 Mar 13  
380 [cited 2020 Apr 23]; Available from: <https://jamanetwork.com/journals/jama/fullarticle/2763188>
- 381 9. Maxmen A. Thousands of coronavirus tests are going unused in US labs. *Nature*. 2020 Apr  
382 9;580(7803):312–3.
- 383 10. Orange County Public Health Order [Internet]. 2020 Mar [cited 2020 Dec 18]. Available from:  
384 <https://cms.ocgov.com/civicaX/filebank/blobdload.aspx?BlobID=114421>
- 385 11. California S of. Essential workforce [Internet]. [cited 2020 Dec 18]. Available from:  
386 <https://covid19.ca.gov/essential-workforce/>
- 387 12. Together OCH. Orange County's Healthier Together<sup>TM</sup>: Indicators<sup>TM</sup>: OC Dashboard [Internet]. [cited  
388 2020 Dec 18]. Available from:  
389 [http://www.ochealthiertogether.org/indicators/index/dashboard?alias=ocdashboard&localeId=26](http://www.ochealthiertogether.org/indicators/index/dashboard?alias=ocdashboard&localeId=267&page=2&card=1)  
390 [7&page=2&card=1](http://www.ochealthiertogether.org/indicators/index/dashboard?alias=ocdashboard&localeId=267&page=2&card=1)
- 391 13. Transforming Orange County [Internet]. Transforming Orange County. [cited 2020 Dec 18].  
392 Available from: <https://transformingoc.advancingjustice-oc.org>
- 393 14. Bruckner TA, Parker DM, Bartell SM, Vieira VM, Khan S, Noymer A, et al. Estimated Seroprevalence  
394 of SARS-CoV-2 Antibodies Among Adults in Orange County, California. *medRxiv*. 2020 Oct  
395 12;2020.10.07.20208660.
- 396 15. de Assis RR, Jain A, Nakajima R, Jasinskas A, Felgner J, Obiero JM, et al. Analysis of SARS-CoV-2  
397 Antibodies in COVID-19 Convalescent Blood using a Coronavirus Antigen Microarray. *bioRxiv*  
398 [Internet]. 2020 May 8 [cited 2021 Jan 8]; Available from:  
399 <https://www.ncbi.nlm.nih.gov/pmc/articles/PMC7217240/>
- 400 16. Anselin L. Local Indicators of Spatial Association. *Geographical Analysis*. 1995;27:93–115.
- 401 17. Zhou G, Afrane YA, Malla S, Githeko AK, Yan G. Active case surveillance, passive case surveillance  
402 and asymptomatic malaria parasite screening illustrate different age distribution, spatial clustering  
403 and seasonality in western Kenya. *Malaria Journal*. 2015 Jan 28;14(1):41.
- 404 18. Mi J, Zhong W, Huang C, Zhang W, Tan L, Ding L. Gender, age and comorbidities as the main  
405 prognostic factors in patients with COVID-19 pneumonia. *Am J Transl Res*. 2020;12(10):6537–48.
- 406 19. Ogedegbe G, Ravenell J, Adhikari S, Butler M, Cook T, Francois F, et al. Assessment of Racial/Ethnic  
407 Disparities in Hospitalization and Mortality in Patients With COVID-19 in New York City. *JAMA*  
408 *Network Open*. 2020 Dec 4;3(12):e2026881.
- 409 20. Rubin-Miller L, Alban C, Sep 16 SSP, 2020. COVID-19 Racial Disparities in Testing, Infection,  
410 Hospitalization, and Death: Analysis of Epic Patient Data [Internet]. KFF. 2020 [cited 2021 Jan 8].  
411 Available from: [https://www.kff.org/coronavirus-covid-19/issue-brief/covid-19-racial-disparities-](https://www.kff.org/coronavirus-covid-19/issue-brief/covid-19-racial-disparities-testing-infection-hospitalization-death-analysis-epic-patient-data/)  
412 [testing-infection-hospitalization-death-analysis-epic-patient-data/](https://www.kff.org/coronavirus-covid-19/issue-brief/covid-19-racial-disparities-testing-infection-hospitalization-death-analysis-epic-patient-data/)

- 413 21. Webb Hooper M, Nápoles AM, Pérez-Stable EJ. COVID-19 and Racial/Ethnic Disparities. JAMA.  
414 2020 Jun 23;323(24):2466.
- 415 22. CDC. Coronavirus Disease 2019 (COVID-19) [Internet]. Centers for Disease Control and Prevention.  
416 2020 [cited 2021 Jan 9]. Available from: [https://www.cdc.gov/coronavirus/2019-ncov/covid-](https://www.cdc.gov/coronavirus/2019-ncov/covid-data/investigations-discovery/hospitalization-death-by-race-ethnicity.html)  
417 [data/investigations-discovery/hospitalization-death-by-race-ethnicity.html](https://www.cdc.gov/coronavirus/2019-ncov/covid-data/investigations-discovery/hospitalization-death-by-race-ethnicity.html)
- 418 23. Gover AR, Harper SB, Langton L. Anti-Asian Hate Crime During the COVID-19 Pandemic: Exploring  
419 the Reproduction of Inequality. Am J Crim Justice. 2020 Jul 7;1–21.
- 420 24. Ng E. The Pandemic of Hate Is Giving Novel Coronavirus Disease (COVID-19) a Helping Hand. Am J  
421 Trop Med Hyg [Internet]. 2020 Apr 20 [cited 2021 Jan 8]; Available from:  
422 <https://www.ncbi.nlm.nih.gov/pmc/articles/PMC7253093/>
- 423 25. Social determinants of health [Internet]. [cited 2020 Dec 18]. Available from:  
424 <https://www.who.int/westernpacific/health-topics/social-determinants-of-health>

425

426

427

428

429

430

431

432

433

434

435

436

437

438

439

440

441

442  
443  
444  
445  
446

447 **Table 1.** Global Moran's *I* statistics for reported case incidence, test positivity, and testing intensity for  
448 each month of the study period (March – August). The *I* statistic indicates the degree of spatial  
449 clustering whereas the simulated p-value gives an indication of statistical significance. Moran's *I* values  
450 roughly range from -1 to 1, with 1 indicating complete spatial clustering (i.e. all areas with high values  
451 are neighboring other areas with high values) and -1 indicating complete spatial dispersion (with high  
452 value areas always neighboring low value areas).

453  
454

| Month         | Case incidence |              | Test positivity |              | Testing intensity |              |
|---------------|----------------|--------------|-----------------|--------------|-------------------|--------------|
|               | <i>I</i>       | p-value      | <i>I</i>        | p-value      | <i>I</i>          | p-value      |
| <i>March</i>  | <b>0.238</b>   | <b>0.002</b> | 0.059           | 0.150        | <b>0.448</b>      | <b>0.001</b> |
| <i>April</i>  | <b>0.168</b>   | <b>0.012</b> | <b>0.271</b>    | <b>0.001</b> | 0.022             | 0.257        |
| <i>May</i>    | <b>0.558</b>   | <b>0.001</b> | <b>0.492</b>    | <b>0.001</b> | <b>0.345</b>      | <b>0.001</b> |
| <i>June</i>   | <b>0.606</b>   | <b>0.001</b> | <b>0.552</b>    | <b>0.001</b> | <b>0.469</b>      | <b>0.001</b> |
| <i>July</i>   | <b>0.591</b>   | <b>0.001</b> | <b>0.500</b>    | <b>0.001</b> | <b>0.408</b>      | <b>0.001</b> |
| <i>August</i> | <b>0.603</b>   | <b>0.001</b> | <b>0.472</b>    | <b>0.001</b> | <b>0.185</b>      | <b>0.002</b> |

455  
456  
457  
458  
459  
460  
461  
462  
463  
464  
465  
466

467  
468  
469  
470  
471  
472  
473  
474  
475  
476  
477  
478

**Table 2:** Generalized additive logistic regression results for odds of testing positive for SARS-CoV-2 in Orange County. This table excludes the coefficients for median income and time due to the interaction between median income and time. A random intercept was included for zip code.

|                               | Counts         |                 | Adjusted Odds Ratio *<br>with (95% CI†) |
|-------------------------------|----------------|-----------------|-----------------------------------------|
|                               | SARS-CoV-2+    | Total           |                                         |
| <b>Age</b>                    |                |                 |                                         |
| 0-4                           | 480 (1.3%)     | 4813 (1.51%)    | Reference                               |
| 5-9                           | 487 (1.32%)    | 3841 (1.21%)    | 1.60 (1.4, 1.84)                        |
| 10-14                         | 840 (2.28%)    | 5037 (1.58%)    | 2.23 (1.97, 2.53)                       |
| 15-19                         | 2075 (5.64%)   | 13730 (4.31%)   | 2.24 (2.01, 2.5)                        |
| 20-24                         | 4529 (12.3%)   | 31910 (10.02%)  | 1.94 (1.75, 2.15)                       |
| 25-29                         | 4537 (12.32%)  | 34997 (10.99%)  | 1.64 (1.48, 1.82)                       |
| 30-34                         | 3691 (10.03%)  | 30112 (9.45%)   | 1.54 (1.39, 1.71)                       |
| 35-39                         | 3220 (8.75%)   | 26010 (8.17%)   | 1.60 (1.44, 1.77)                       |
| 40-49                         | 5809 (15.78%)  | 45255 (14.21%)  | 1.68 (1.52, 1.86)                       |
| 50-59                         | 5639 (15.32%)  | 48937 (15.37%)  | 1.49 (1.35, 1.65)                       |
| 60-69                         | 2964 (8.05%)   | 36408 (11.43%)  | 1.01 (0.91, 1.13)                       |
| 70-79                         | 1408 (3.82%)   | 22204 (6.97%)   | 0.76 (0.68, 0.85)                       |
| 80+                           | 1137 (3.09%)   | 15238 (4.78%)   | 0.79 (0.71, 0.89)                       |
| <b>Gender</b>                 |                |                 |                                         |
| Female                        | 18752 (50.93%) | 174949 (54.93%) | Reference                               |
| Male                          | 18064 (49.07%) | 143543 (45.07%) | 1.21 (1.18, 1.23)                       |
| <b>Race/ethnicity</b>         |                |                 |                                         |
| White                         | 11326 (30.76%) | 62200 (19.53%)  | Reference                               |
| Asian                         | 1438 (3.91%)   | 13764 (4.32%)   | 0.52 (0.49, 0.55)                       |
| Black                         | 280 (0.76%)    | 2055 (0.65%)    | 0.58 (0.52, 0.66)                       |
| Hispanic                      | 3305 (8.98%)   | 9044 (2.84%)    | 1.71 (1.63, 1.79)                       |
| Native American               | 48 (0.13%)     | 307 (0.1%)      | 0.76 (0.56, 1.03)                       |
| Pacific Islander              | 110 (0.3%)     | 1583 (0.5%)     | 0.35 (0.29, 0.42)                       |
| Other                         | 3768 (10.23%)  | 29467 (9.25%)   | 0.43 (0.41, 0.45)                       |
| Unknown                       | 16541 (44.93%) | 200072 (62.82%) | 0.33 (0.32, 0.34)                       |
| <b>% with College Degree‡</b> |                |                 |                                         |
| 1st Quartile                  | 20243 (54.98%) | 121454 (38.13%) | Reference                               |
| 2nd Quartile                  | 9284 (25.22%)  | 88178 (27.69%)  | 0.77 (0.66, 0.9)                        |
| 3rd Quartile                  | 4497 (12.21%)  | 64915 (20.38%)  | 0.59 (0.49, 0.71)                       |
| 4th Quartile                  | 2792 (7.58%)   | 43945 (13.8%)   | 0.61 (0.49, 0.76)                       |

| % with Insurance                              |                |                 |                   |
|-----------------------------------------------|----------------|-----------------|-------------------|
| 1st Quartile                                  | 19270 (52.34%) | 112811 (35.42%) | Reference         |
| 2nd Quartile                                  | 10249 (27.84%) | 94061 (29.53%)  | 0.74 (0.65, 0.85) |
| 3rd Quartile                                  | 3774 (10.25%)  | 53358 (16.75%)  | 0.57 (0.47, 0.69) |
| 4th Quartile                                  | 3523 (9.57%)   | 58262 (18.29%)  | 0.51 (0.41, 0.63) |
| Population Density (1000ppl/km <sup>2</sup> ) |                |                 | 1.07 (0.99, 1.15) |

479 \* Adjusted for all covariates listed plus zip code estimated median income and time of test in  
 480 days. Model intercept represents odds of a white female in the 0 to 4 age group in a zip code in  
 481 the first quartile of college degree and insured with the average population density. The odds of  
 482 this individual testing positive for COVID-19 is estimated to be 0.19 (0.16,0.22)  
 483 † 95% Confidence Interval  
 484 ‡ Estimated: percent of people with a bachelor’s degree, percent of people with medical insurance,  
 485 and population density in an individual’s zip code  
 486  
 487  
 488

489 **Table 3.** Logistic regression results for odds of dying among those who tested positive for SARS-CoV-2 in  
 490 Orange County. A random intercept was included for zip code.  
 491

|                                               | Counts          |                | Adjusted Odds Ratio<br>with (95% CI) |
|-----------------------------------------------|-----------------|----------------|--------------------------------------|
|                                               | COVID-19 Deaths | Total          |                                      |
| Age (decades)                                 |                 |                | 2.57 (2.46, 2.68)                    |
| Gender                                        |                 |                |                                      |
| Female                                        | 542 (43.43%)    | 21852 (51.16%) | Reference                            |
| Male                                          | 706 (56.57%)    | 20858 (48.84%) | 2.00 (1.74, 2.29)                    |
| Race/ethnicity                                |                 |                |                                      |
| White                                         | 832 (66.67%)    | 13894 (32.53%) | Reference                            |
| Asian                                         | 227 (18.19%)    | 2028 (4.75%)   | 1.31 (1.08, 1.59)                    |
| Black                                         | 19 (1.52%)      | 347 (0.81%)    | 0.95 (0.56, 1.62)                    |
| Hispanic                                      | 127 (10.18%)    | 3917 (9.17%)   | 0.94 (0.75, 1.17)                    |
| Native American                               | 3 (0.24%)       | 60 (0.14%)     | 0.71 (0.19, 2.63)                    |
| Pacific Islander                              | 6 (0.48%)       | 140 (0.33%)    | 1.00 (0.41, 2.42)                    |
| Unknown                                       | 34 (2.72%)      | 22324 (52.27%) | 0.03 (0.02, 0.05)                    |
| % with College Degree                         |                 |                |                                      |
| 1st Quartile                                  | 768 (61.54%)    | 23401 (54.79%) | Reference                            |
| 2nd Quartile                                  | 259 (20.75%)    | 10711 (25.08%) | 0.73 (0.53, 1.01)                    |
| 3rd Quartile                                  | 178 (14.26%)    | 5336 (12.49%)  | 0.78 (0.5, 1.21)                     |
| 4th Quartile                                  | 43 (3.45%)      | 3262 (7.64%)   | 0.51 (0.27, 0.94)                    |
| % with Insurance                              |                 |                |                                      |
| 1st Quartile                                  | 675 (54.09%)    | 22170 (51.91%) | Reference                            |
| 2nd Quartile                                  | 366 (29.33%)    | 11997 (28.09%) | 0.83 (0.62, 1.11)                    |
| 3rd Quartile                                  | 124 (9.94%)     | 4403 (10.31%)  | 1.11 (0.7, 1.76)                     |
| 4th Quartile                                  | 83 (6.65%)      | 4140 (9.69%)   | 0.58 (0.34, 0.99)                    |
| Population Density (1000ppl/km <sup>2</sup> ) |                 |                | 1.02 (0.88, 1.2)                     |
| Median Income (std. dev.)                     |                 |                | 0.96 (0.76, 1.21)                    |

|                                |  |  |                   |
|--------------------------------|--|--|-------------------|
| Time (std. dev.)               |  |  | 1.05 (0.93, 1.19) |
| COVID ICU patients (std. dev.) |  |  | 1.06 (0.97, 1.16) |

492  
 493 \* Model intercept represents odds of death for a white female diagnosed with SARS-CoV-2 in the 0 to 4 age group in a zip code in the first  
 494 quartile of college degree and insured with the average population density in Orange County. The odds of this individual testing dying is  
 495 estimated to be 0 (0,0)  
 496 † 95% Confidence Interval  
 497 ‡ Estimated percent of people with a bachelor's degree and with medical insurance in an individual's zip code  
 498 § Percent of hospital beds not being used by COVID-19 patients in Orange County  
 499

500 **Table 4.** Logistic regression results for odds ratio of testing sero-positive for SARS-CoV-2 in Orange  
 501 County.  
 502

|                                               | Counts       |               | Adjusted Odds Ratio<br>with (95% CI) |
|-----------------------------------------------|--------------|---------------|--------------------------------------|
|                                               | SARS-CoV2+   | Total         |                                      |
| <b>Age</b>                                    |              |               |                                      |
| 18-24                                         | 19 (5.43%)   | 158 (5.35%)   | Reference                            |
| 25-29                                         | 31 (8.86%)   | 234 (7.92%)   | 1.08 (0.57, 2.02)                    |
| 30-34                                         | 33 (9.43%)   | 275 (9.31%)   | 0.96 (0.52, 1.8)                     |
| 35-39                                         | 35 (10%)     | 328 (11.1%)   | 0.84 (0.45, 1.55)                    |
| 40-49                                         | 83 (23.71%)  | 651 (22.04%)  | 1.06 (0.61, 1.84)                    |
| 50-59                                         | 82 (23.43%)  | 659 (22.31%)  | 1.07 (0.62, 1.87)                    |
| 60-69                                         | 46 (13.14%)  | 418 (14.15%)  | 1.00 (0.55, 1.83)                    |
| 70-79                                         | 18 (5.14%)   | 188 (6.36%)   | 0.92 (0.45, 1.89)                    |
| 80+                                           | 3 (0.86%)    | 43 (1.46%)    | 0.63 (0.17, 2.26)                    |
| <b>Sex</b>                                    |              |               |                                      |
| Female                                        | 222 (63.43%) | 1668 (56.47%) | Reference                            |
| Male                                          | 128 (36.57%) | 1286 (43.53%) | 0.75 (0.59, 0.94)                    |
| <b>Race</b>                                   |              |               |                                      |
| White                                         | 108 (30.86%) | 1228 (41.57%) | Reference                            |
| Asian                                         | 47 (13.43%)  | 435 (14.73%)  | 1.26 (0.86, 1.83)                    |
| Black                                         | 5 (1.43%)    | 42 (1.42%)    | 1.29 (0.49, 3.4)                     |
| Hispanic                                      | 162 (46.29%) | 1010 (34.19%) | 1.55 (1.17, 2.03)                    |
| Pacific Islander                              | 3 (0.86%)    | 12 (0.41%)    | 3.94 (1.07, 14.57)                   |
| Unknown                                       | 25 (7.14%)   | 227 (7.68%)   | 1.26 (0.78, 2.02)                    |
| <b>% with College Degree</b>                  |              |               |                                      |
| 1st Quartile                                  | 158 (45.14%) | 937 (31.72%)  | Reference                            |
| 2nd Quartile                                  | 92 (26.29%)  | 940 (31.82%)  | 0.98 (0.65, 1.48)                    |
| 3rd Quartile                                  | 59 (16.86%)  | 596 (20.18%)  | 1.31 (0.74, 2.29)                    |
| 4th Quartile                                  | 41 (11.71%)  | 481 (16.28%)  | 1.21 (0.63, 2.3)                     |
| <b>% with Insurance</b>                       |              |               |                                      |
| 1st Quartile                                  | 154 (44%)    | 928 (31.42%)  | Reference                            |
| 2nd Quartile                                  | 95 (27.14%)  | 869 (29.42%)  | 0.97 (0.66, 1.42)                    |
| 3rd Quartile                                  | 50 (14.29%)  | 539 (18.25%)  | 1.04 (0.57, 1.88)                    |
| 4th Quartile                                  | 51 (14.57%)  | 618 (20.92%)  | 0.94 (0.5, 1.77)                     |
| Population Density (1000ppl/km <sup>2</sup> ) |              |               | 1.02 (0.84, 1.24)                    |
| Medina Income (std. dev.)                     |              |               | 0.75 (0.57, 0.98)                    |

|                        |  |  |                   |
|------------------------|--|--|-------------------|
| % Zip Code SARS-CoV-2+ |  |  | 1.28 (0.95, 1.73) |
|------------------------|--|--|-------------------|

503  
504 \* Model intercept represents odds of testing sero-positive for SARS-CoV2 for a white female diagnosed with SARS-CoV2 in the 18-24 age group  
505 in a zip code in the first quartile of college degree and insured with the average population density, and average percent of SARS-CoV2 positive  
506 individuals in Orange County. The odds of this individual testing sero-positive is estimated to be 0.074 (0.031,0.178)  
507 † 95% confidence interval computed with robust standard errors  
508 ‡ Native American/Native Alaskan race group not included in analysis due to lack of data, no individual of this race group tested seropositive  
509 § The estimated percent of people with a bachelor's degree, and similarly the estimated percent of people with medical insurance, in an  
510 individual's zip code  
511 ¶ Number of individuals who tested positive in individual's zip code reported to OC Public Health Department from March 1st to August 16th,  
512 divided by estimated population of zip code

## 513 FIGURES

514  
515 **Figure 1:** A.) Reported case incidence of COVID-19 in Orange County, California by month. B.) Results  
516 from tests of statistical clustering (LISA statistics). Case incidence is calculated as the number of cases  
517 per 100,000 people per week.

518 **Figure 2:** A.) Test intensity in Orange County by month. B.) Results from tests of statistical clustering  
519 (LISA statistics). Test intensity is calculated as the number of tests per 100,000 people per week at the  
520 zip code level.

521 **Figure 3:** A.) Test positivity (% of tests positive for SARS-CoV-2) at the zip code level in Orange County by  
522 month. B.) Results from tests of statistical clustering (LISA statistics).

523 **Figure 4:** A.) Seropositivity to SARS-CoV-2 at the zip code level, B.) Results of LISA statistics for  
524 seropositivity data.

525 **Figure 5:** Model adjusted odds ratios and confidence intervals from the logistic regression for odds of  
526 testing positive (Table 1)

527 **Figure 6:** Model adjusted odds ratios and confidence intervals from the logistic regression for the odds  
528 of dying from COVID-19

529 **Figure 7:** Model adjusted odds ratios and confidence intervals from the logistic regression for the odds  
530 of being seropositive for SARS-CoV-2

531

532

533

534

535

**A**

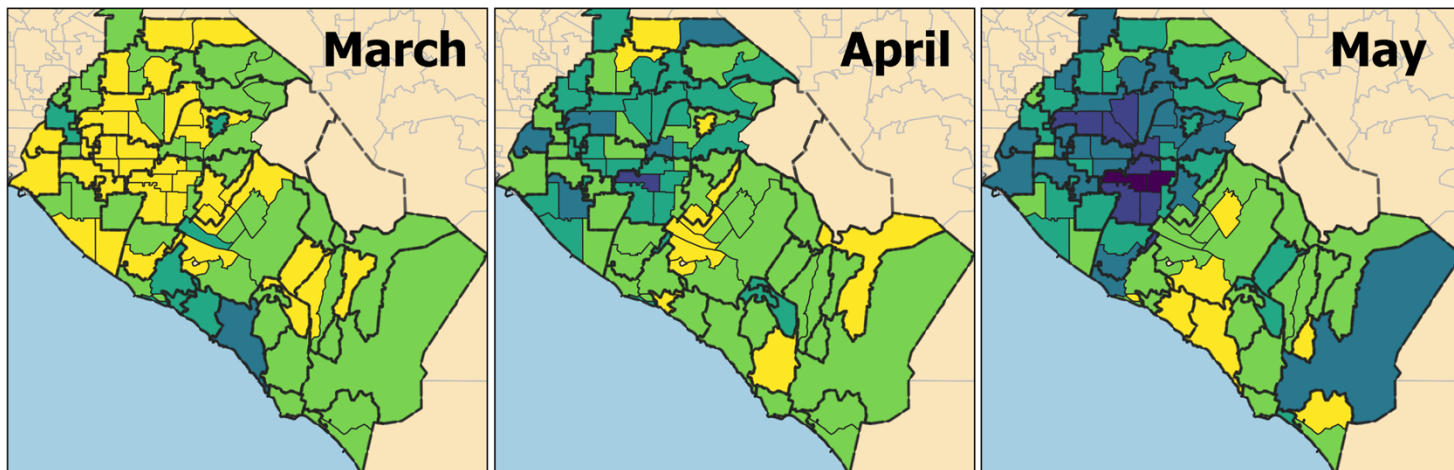

**B**

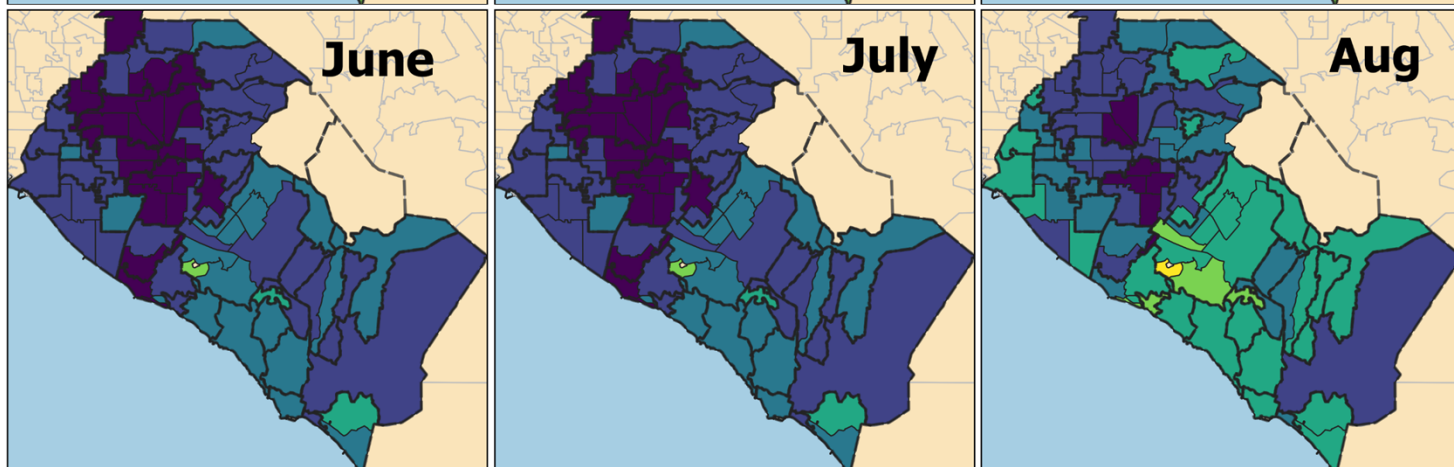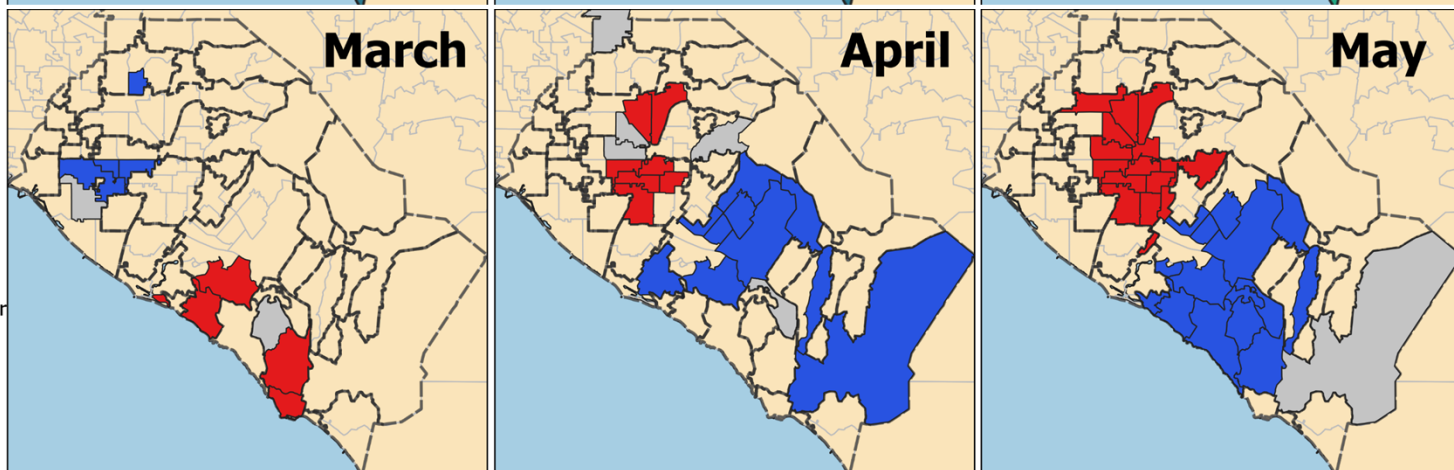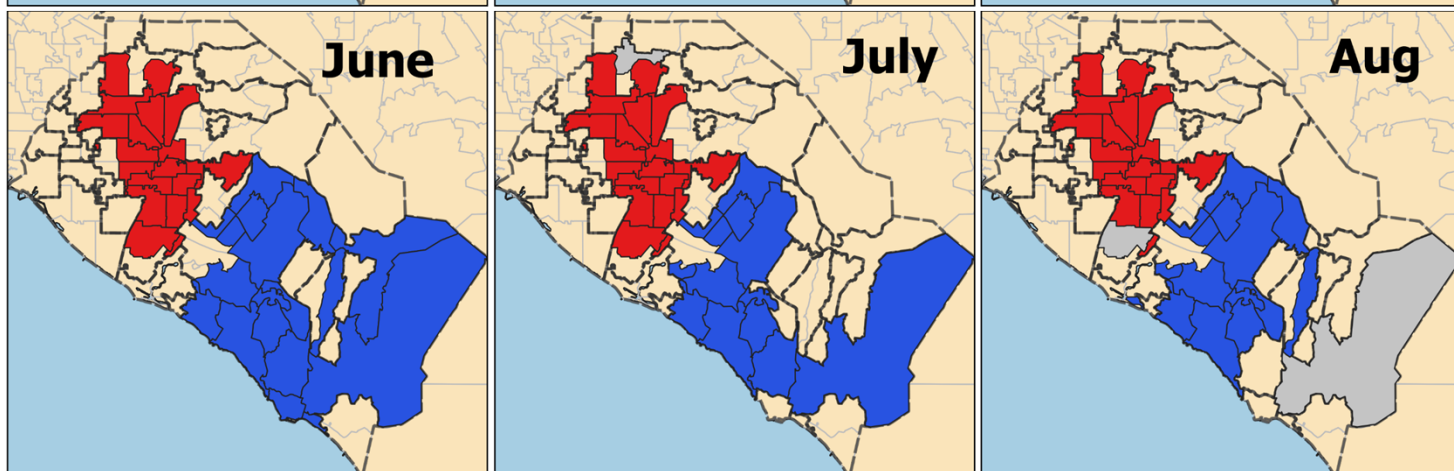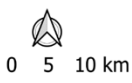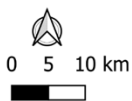



**A**

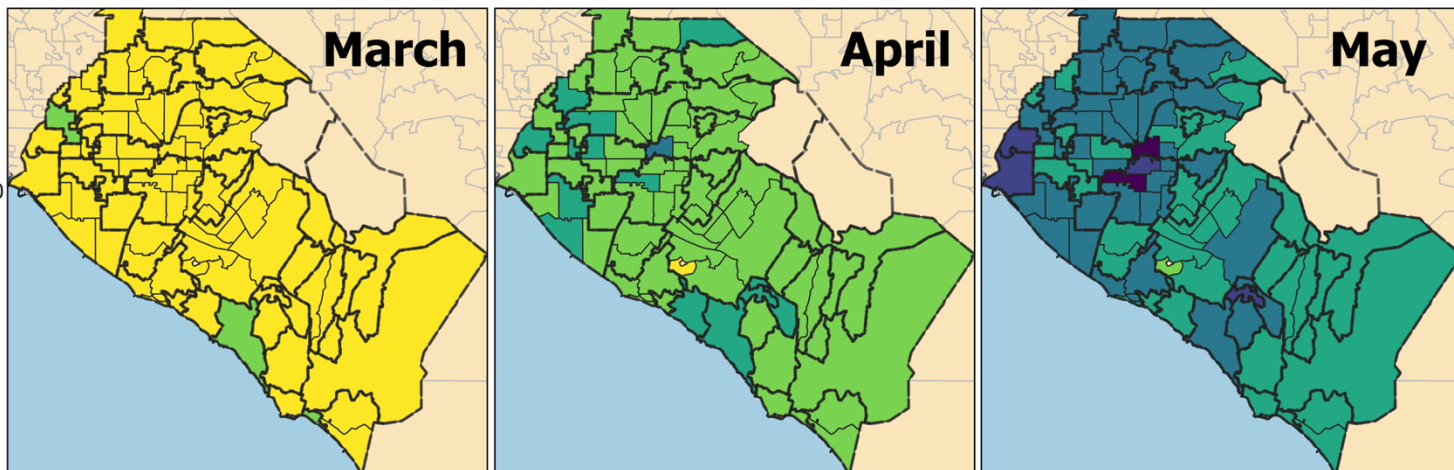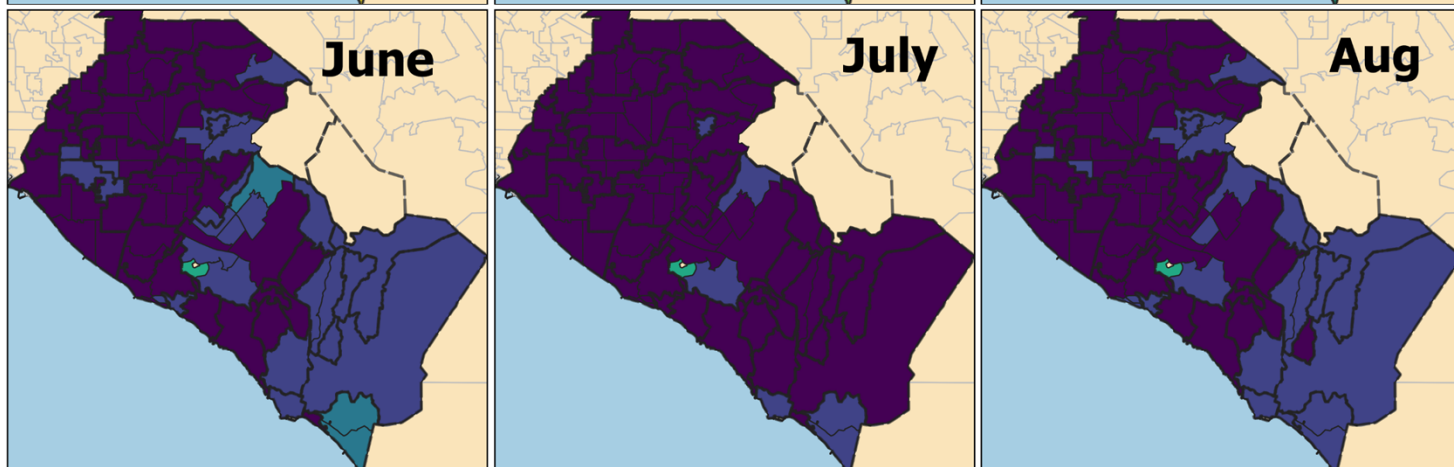

**B**

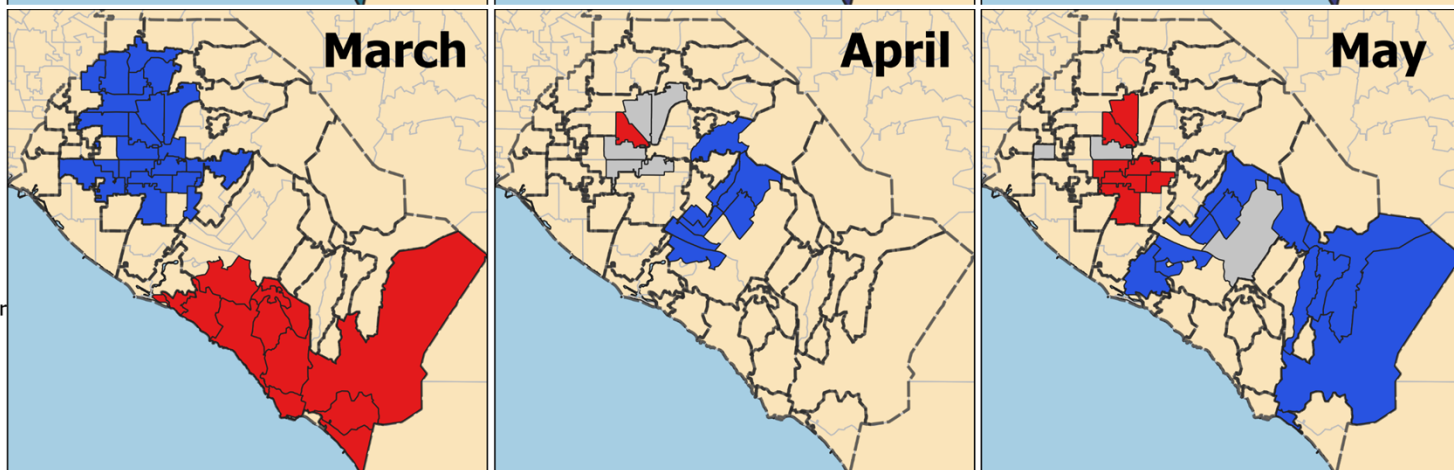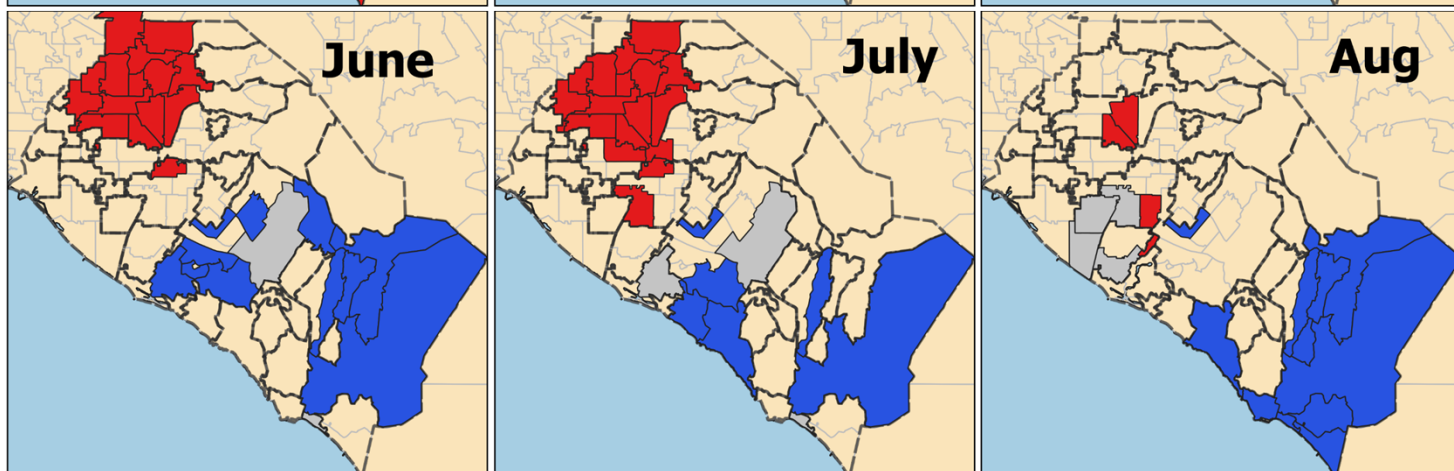

**A**

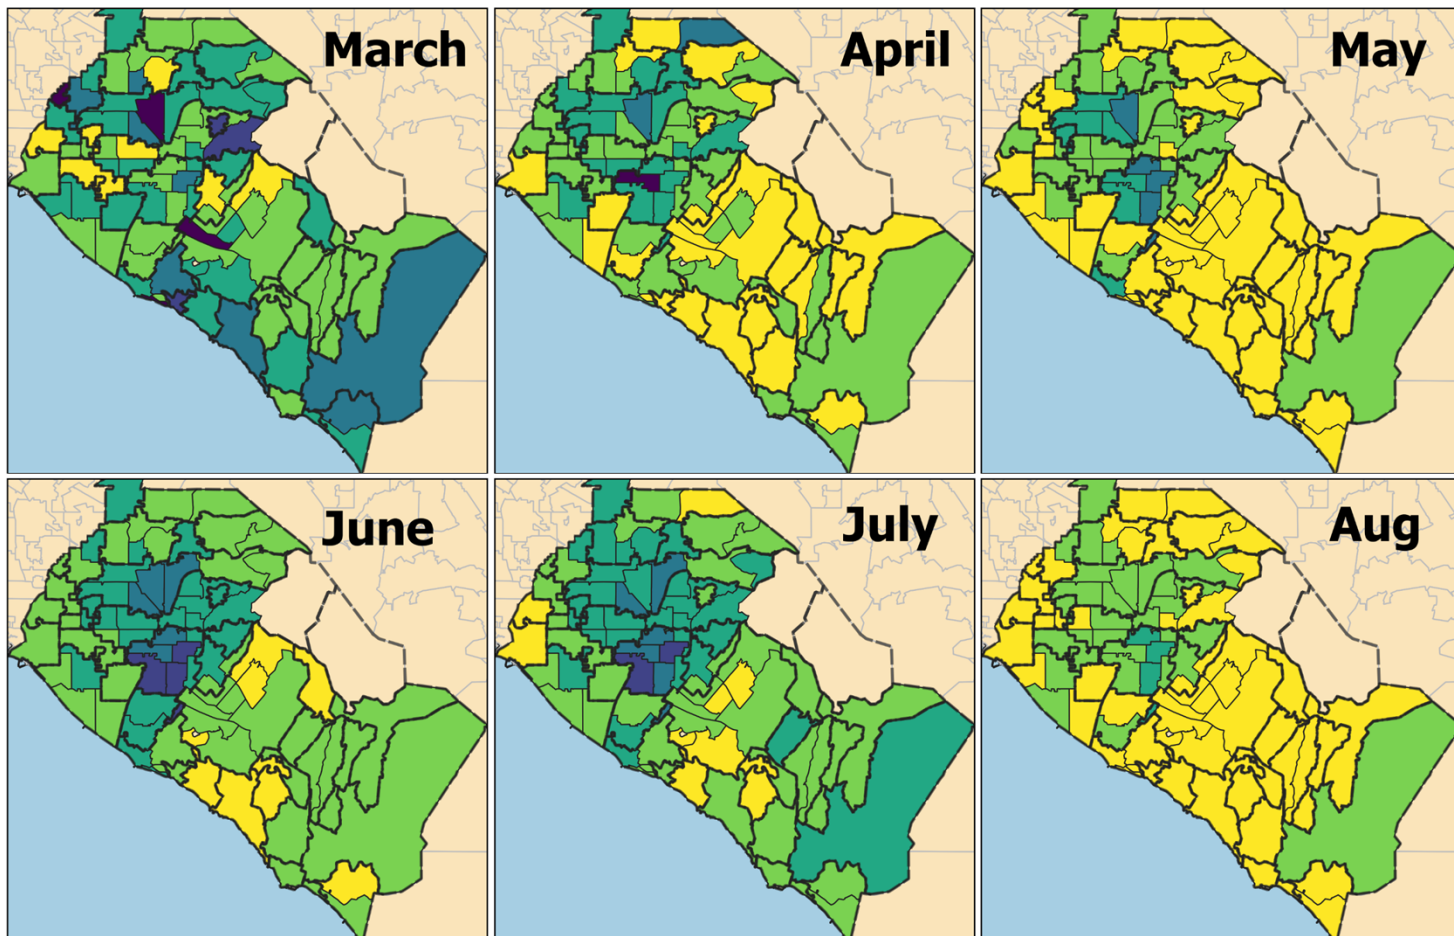

**B**

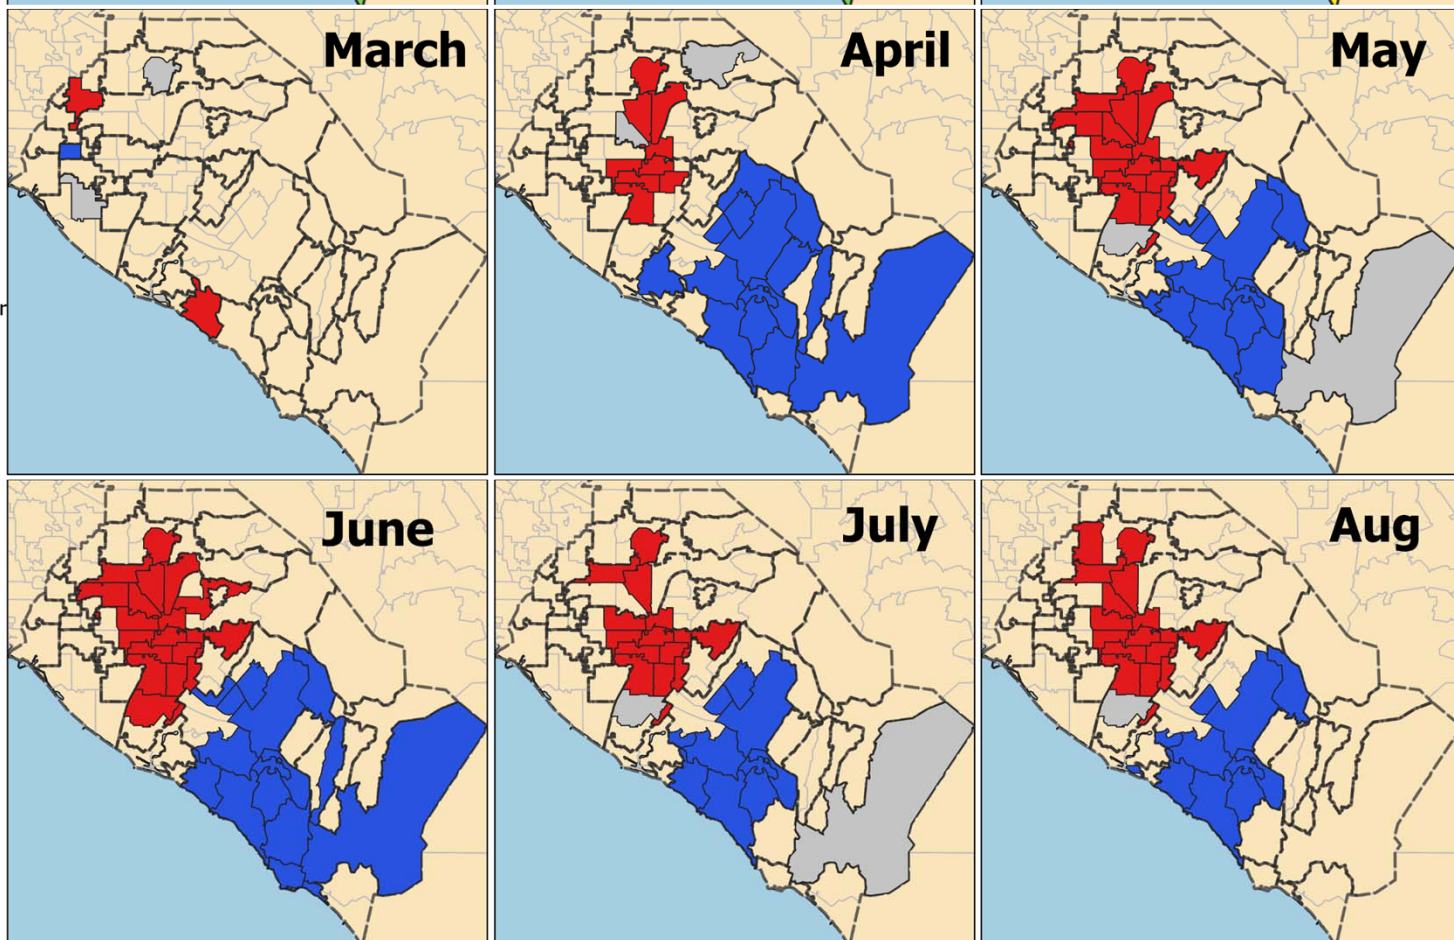

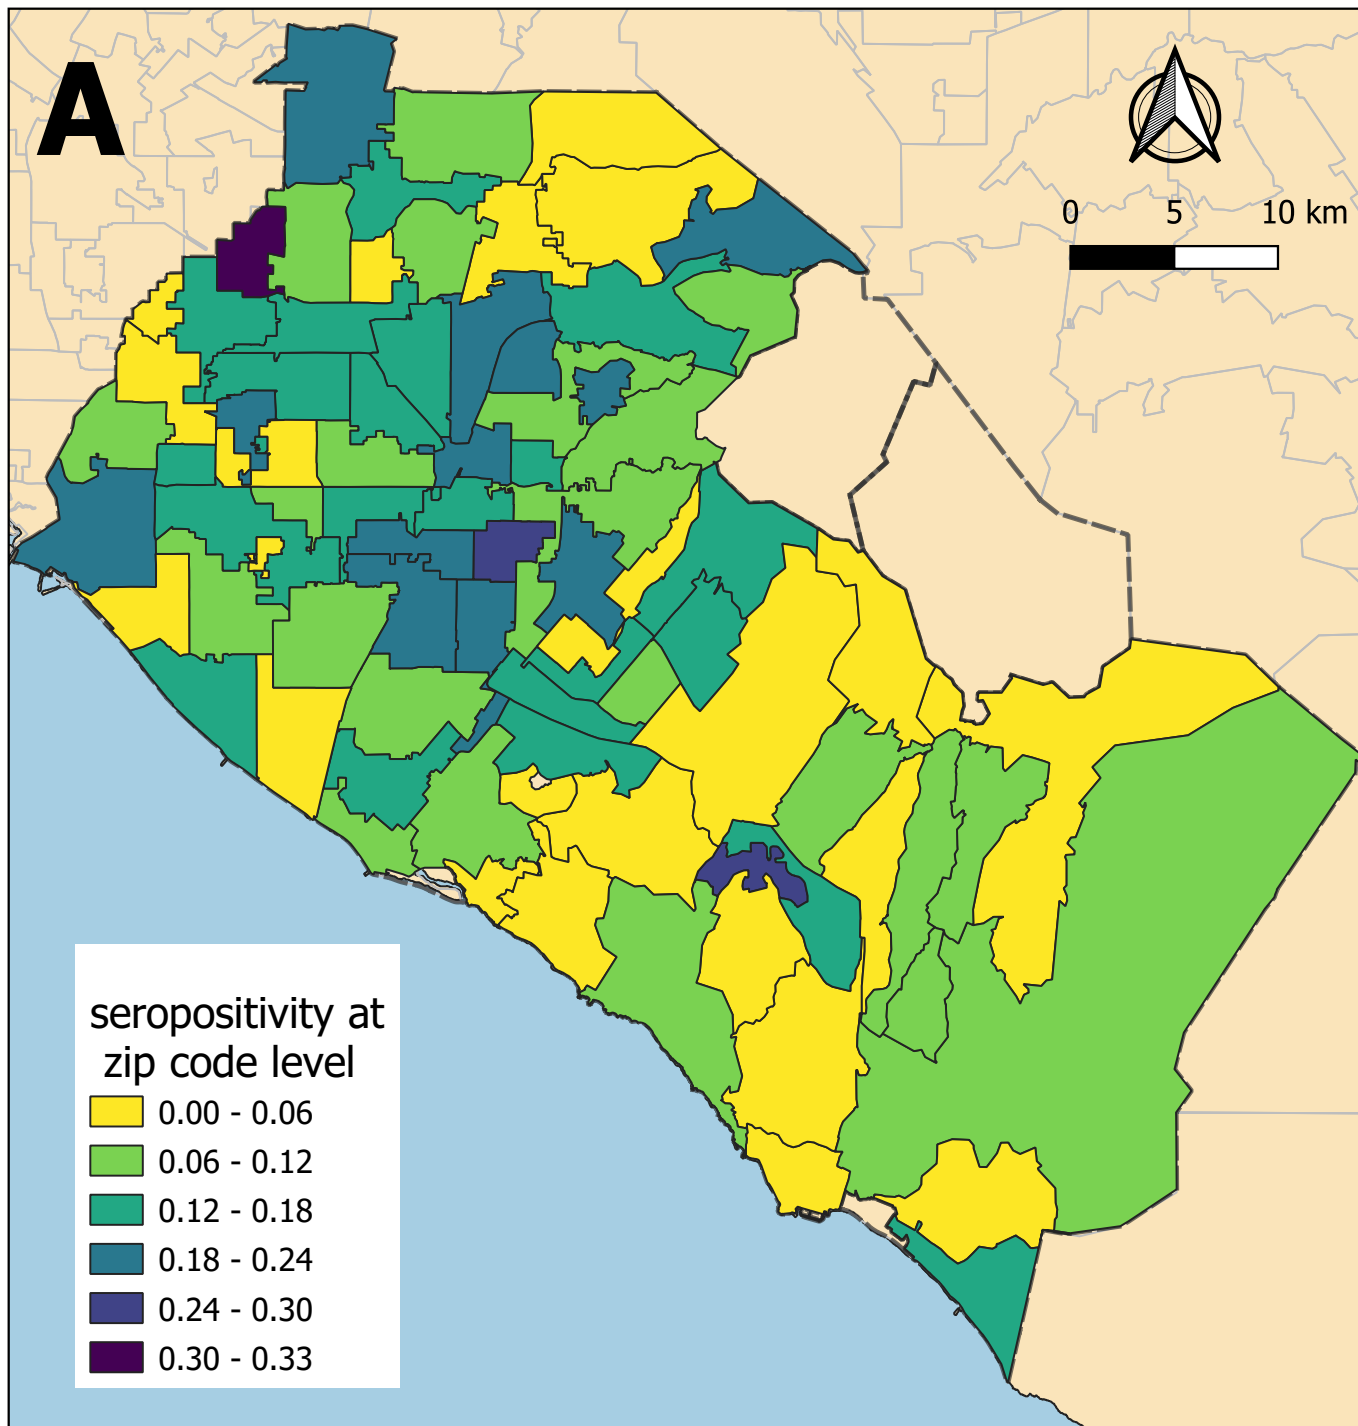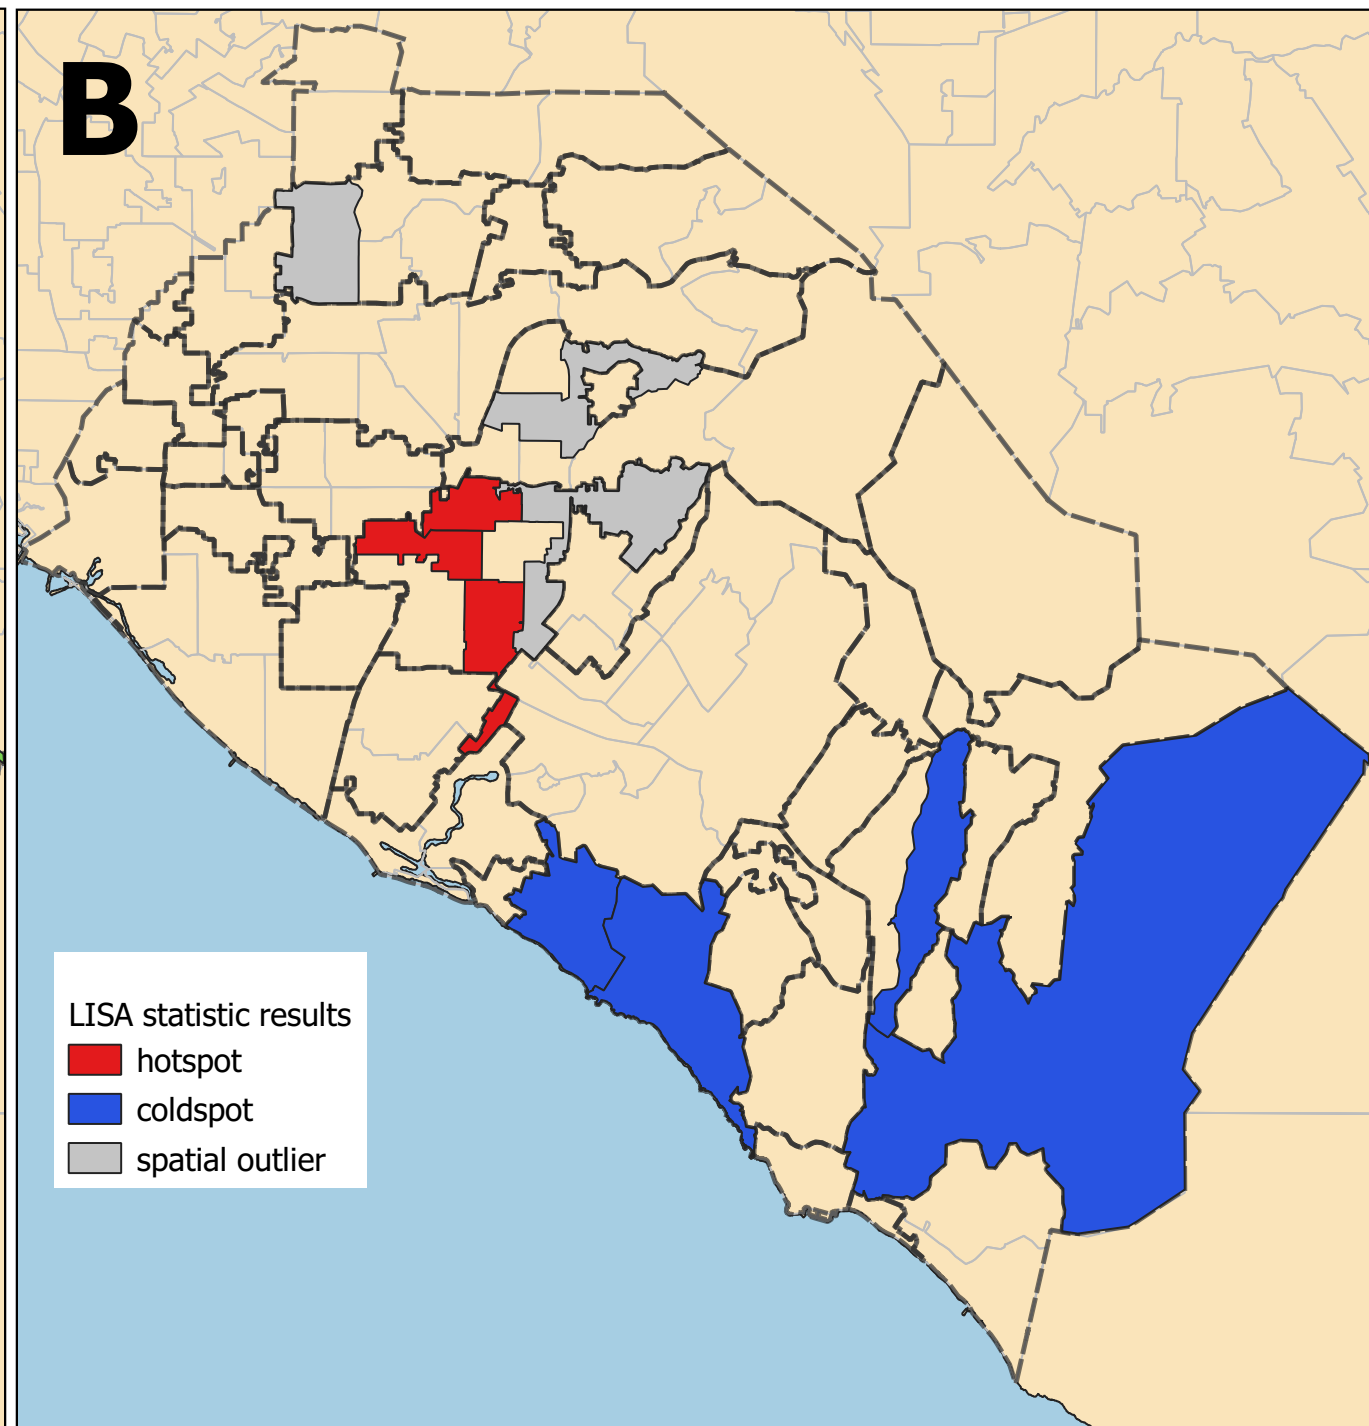

# Generalized additive logistic regression results for odds ratio of testing SARS-CoV-2 positive in Orange County

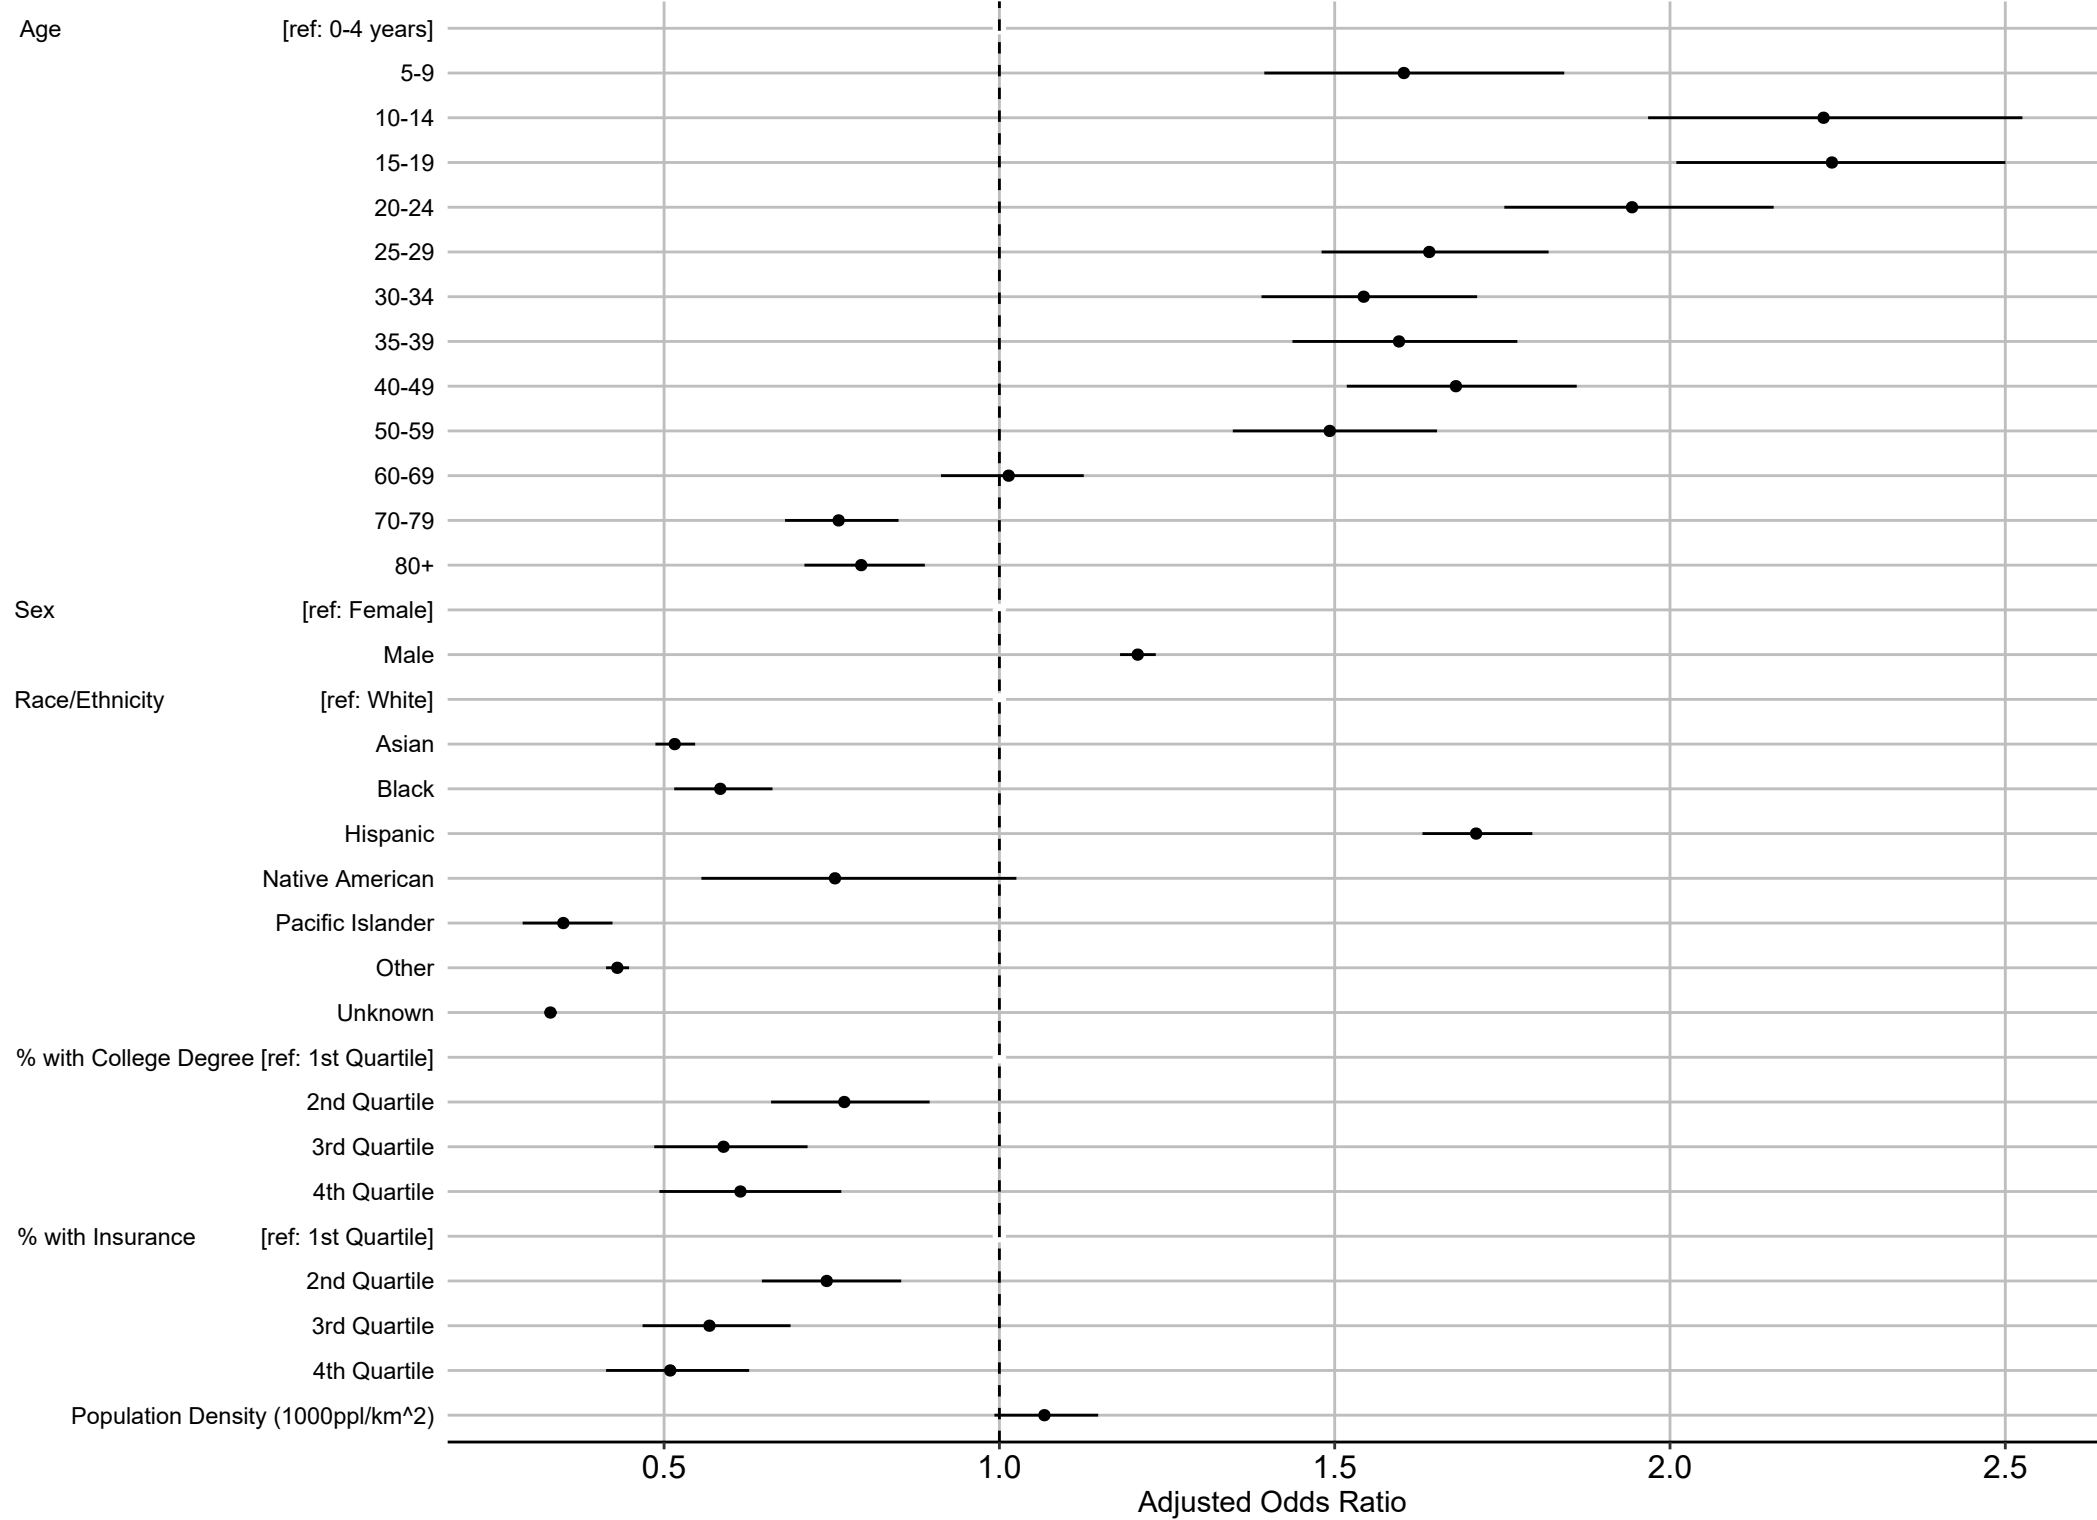

# Logistic regression results for odds ratio of COVID-19 related mortality given SARS-CoV-2 positive in Orange County

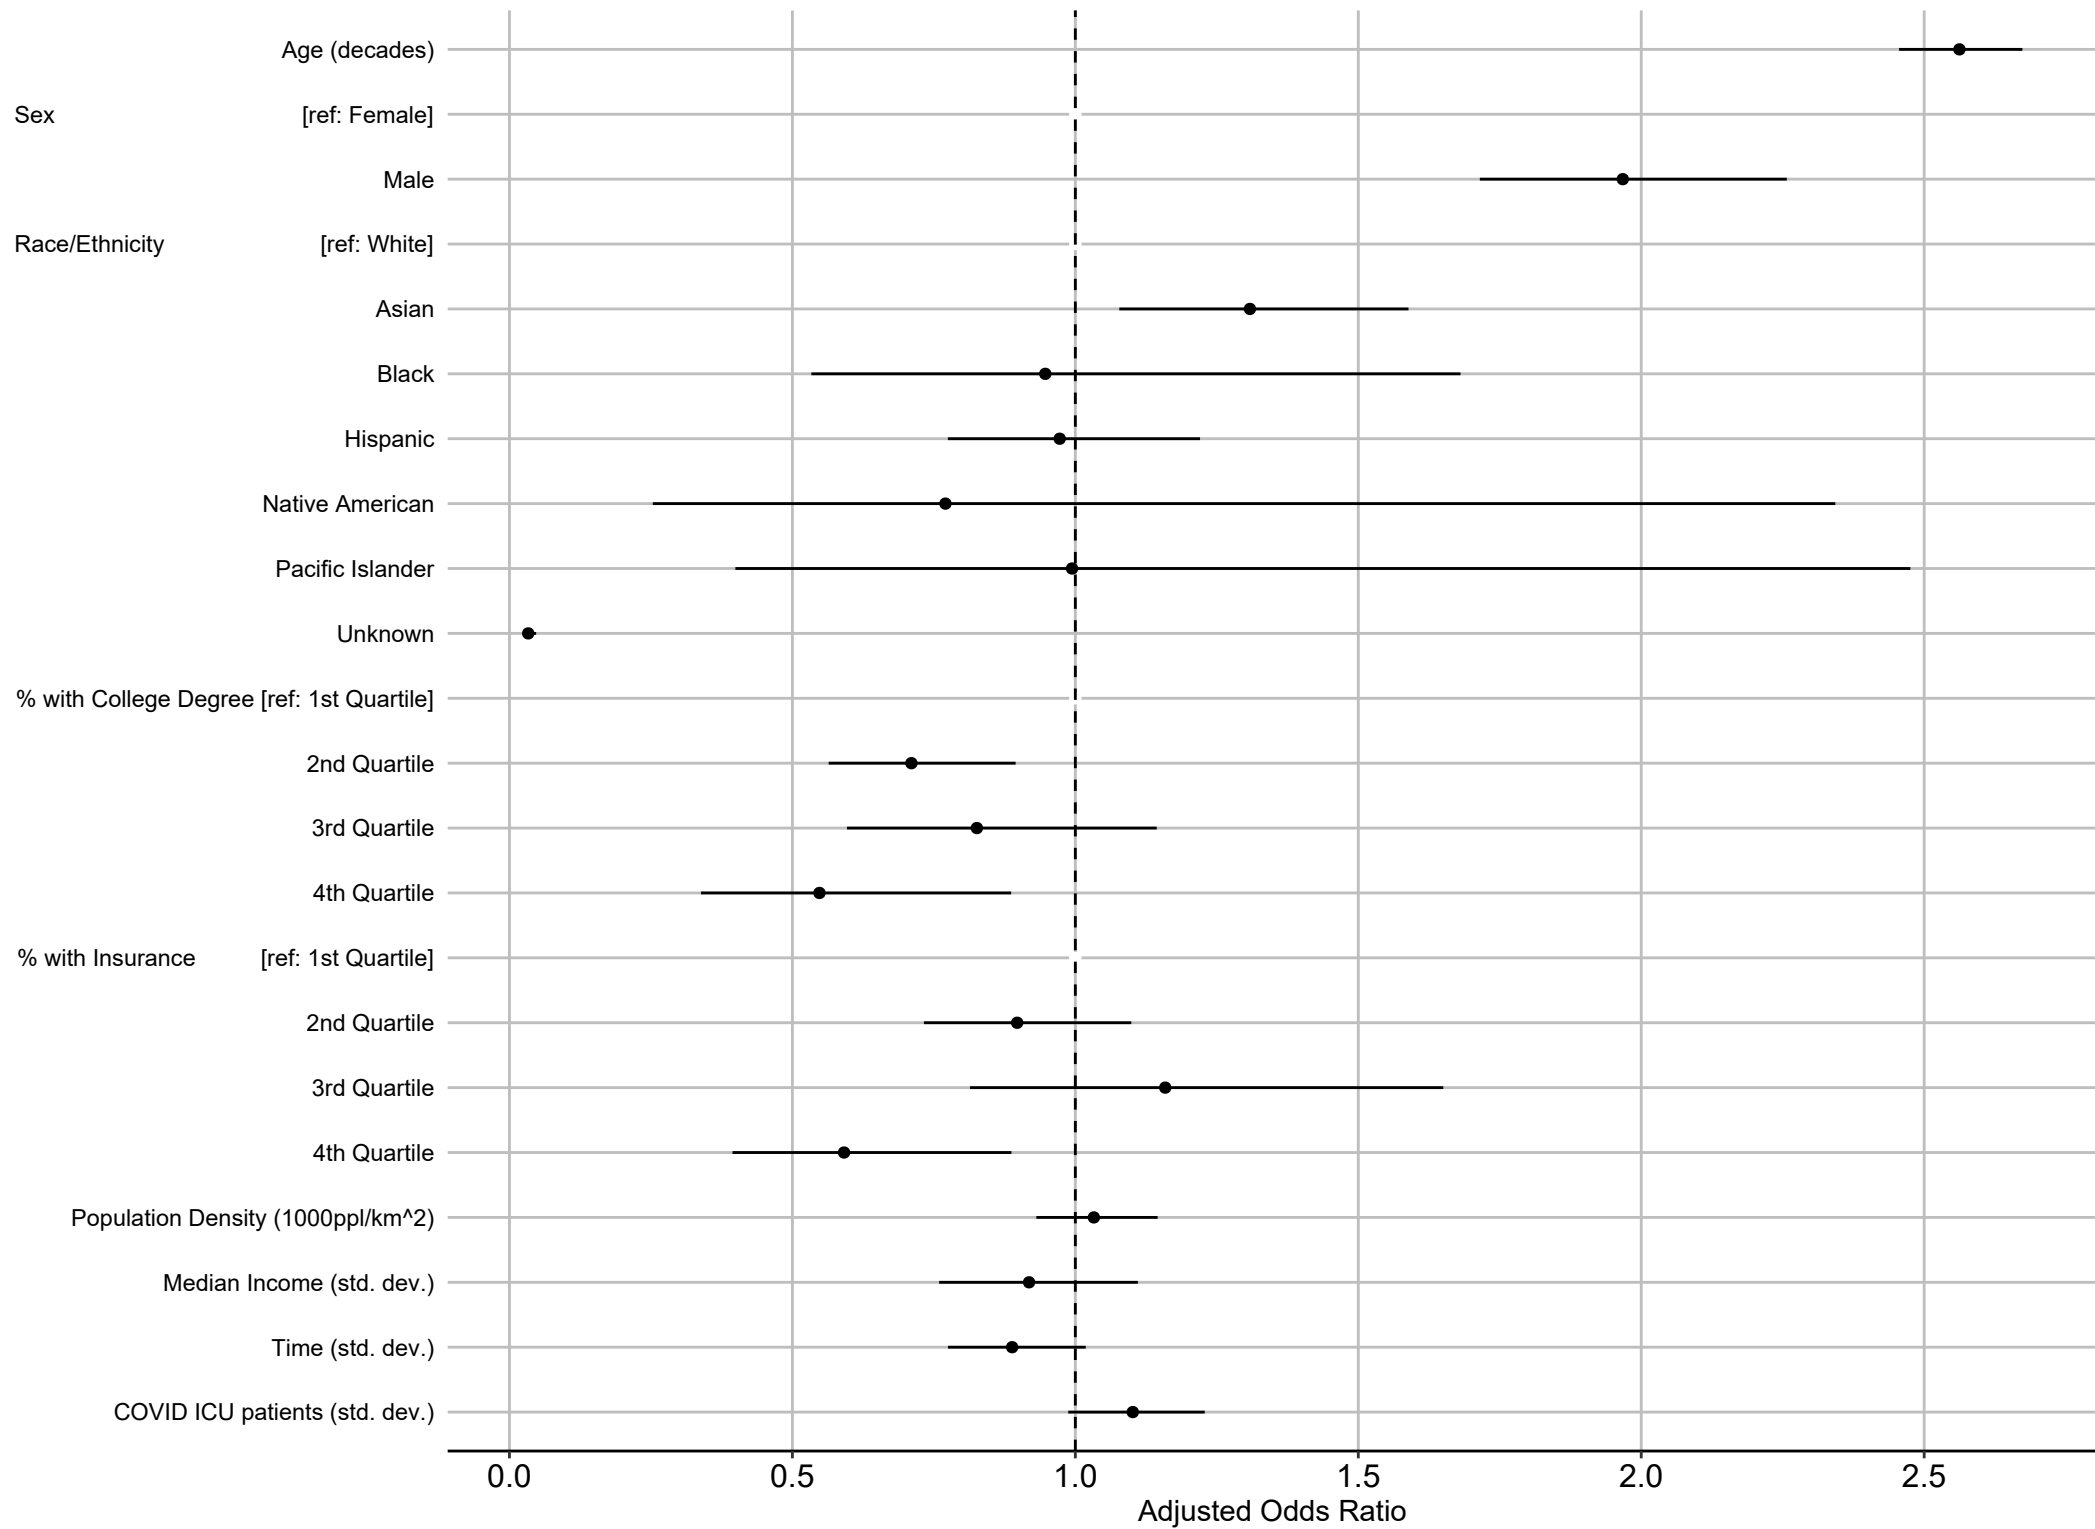

# Logistic regression results for odds ratio of testing sero-positive for SARS-CoV-2 in Orange County

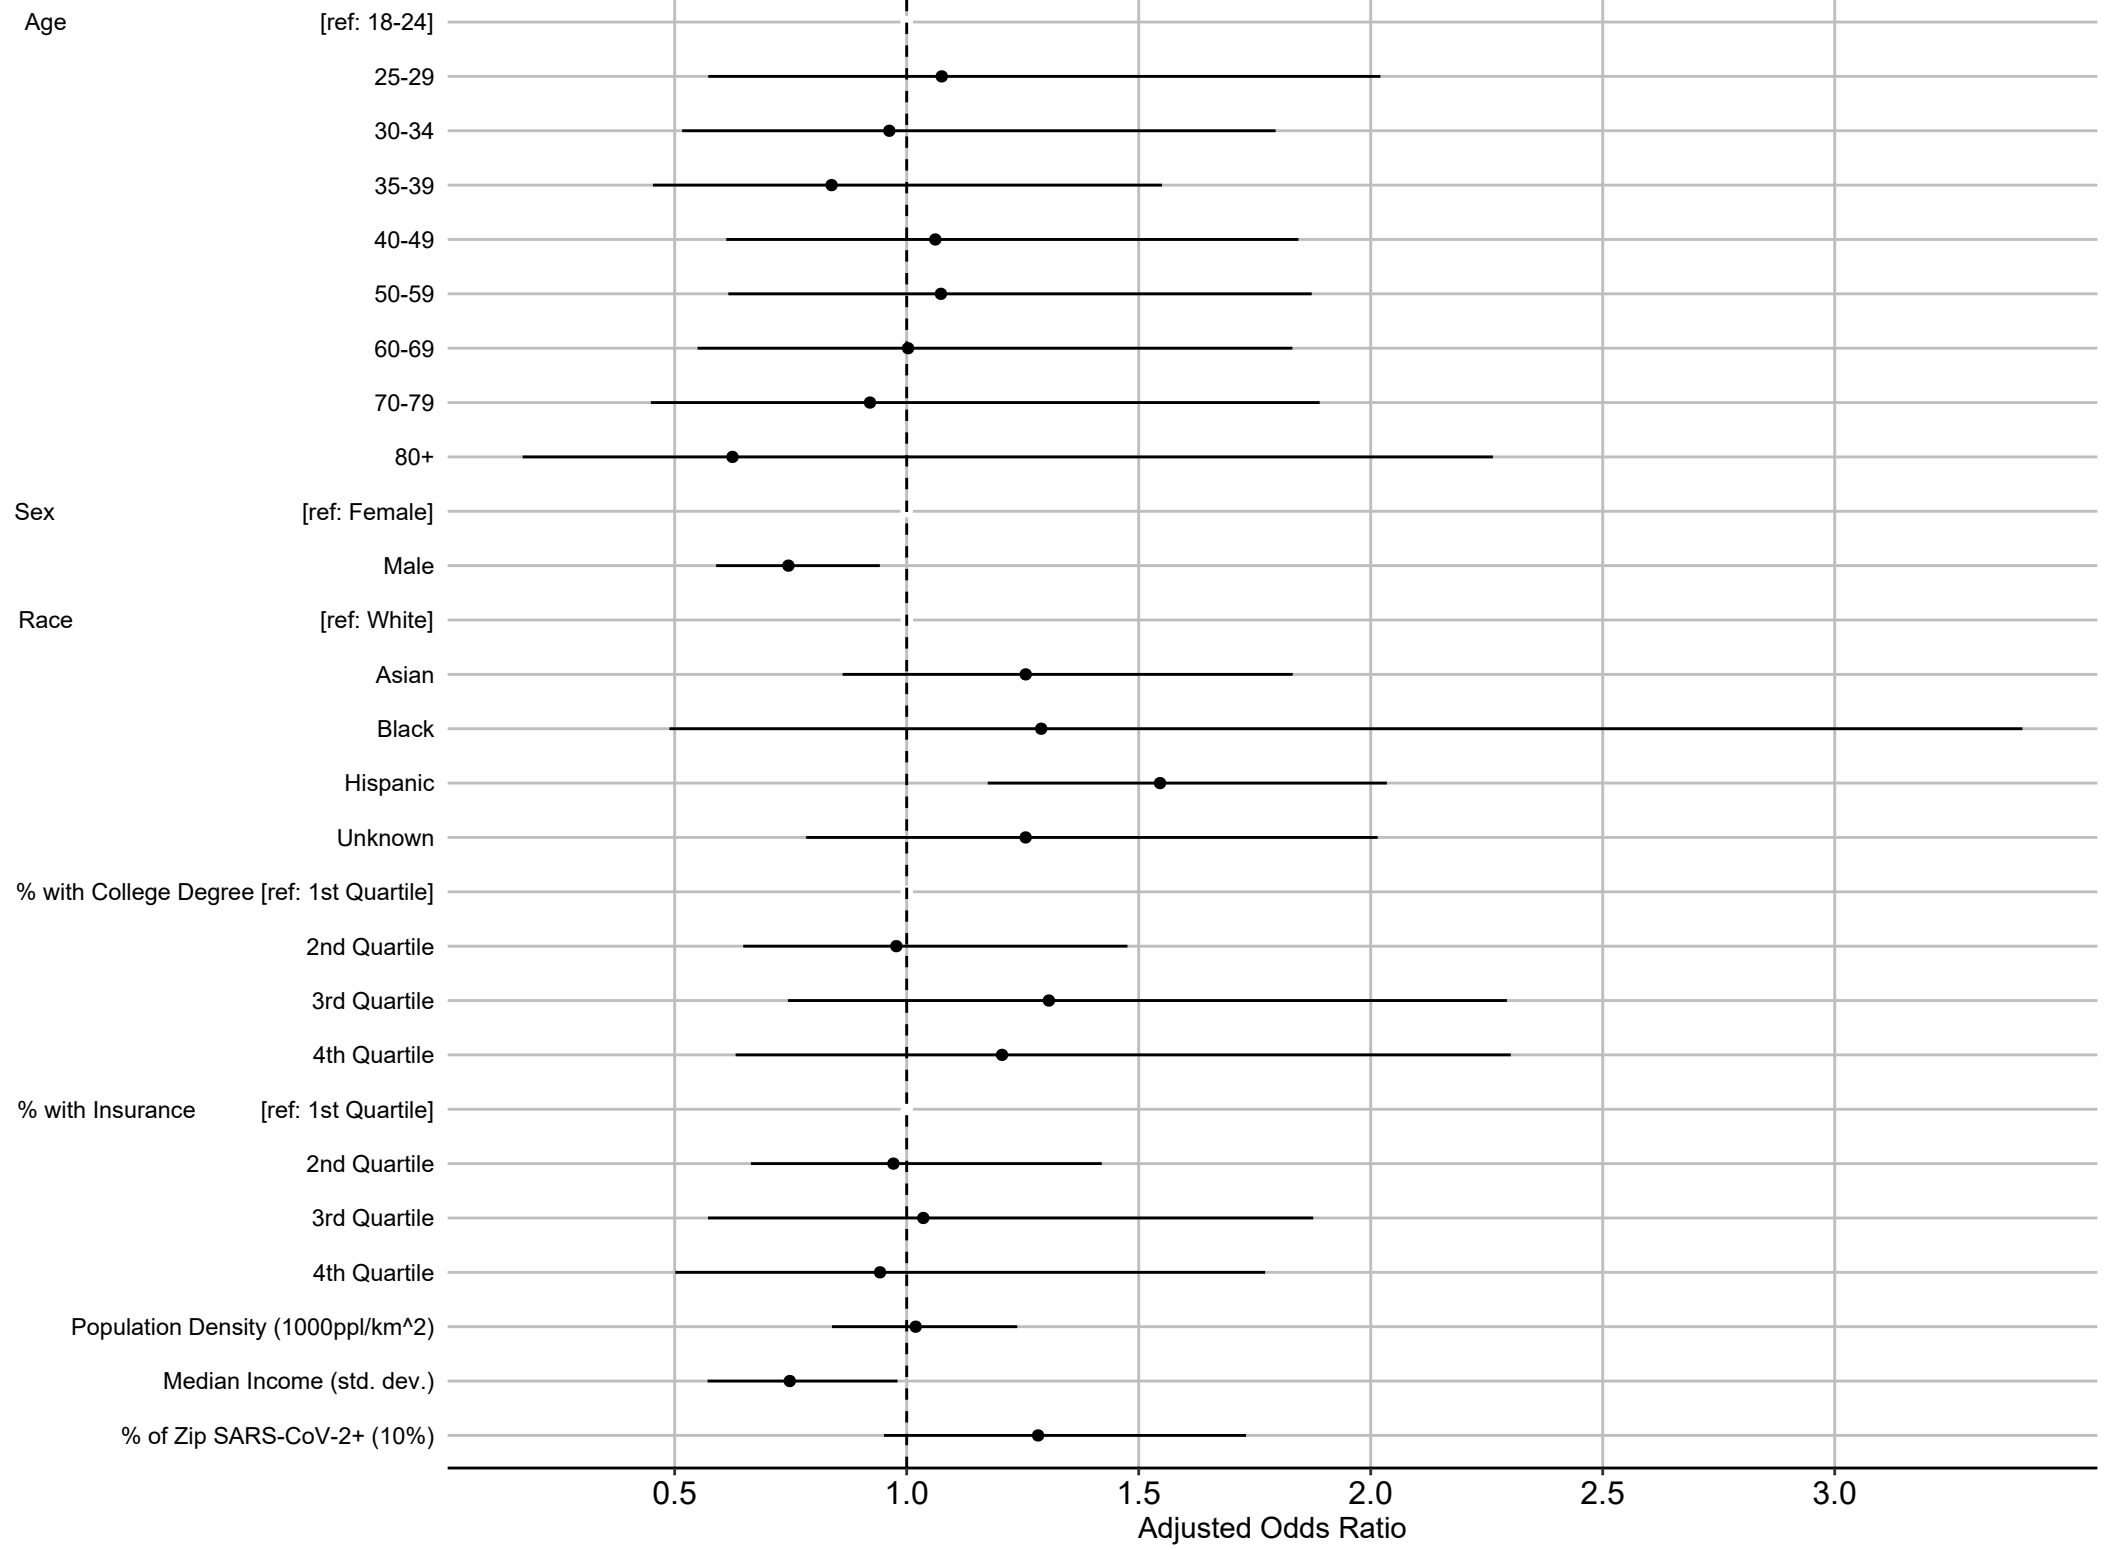

Source: https://medrxiv.org/content/10.1101/2021.01.13.21249507v2.full.pdf
